# Supplementary material for: Analysis of endometrial microbiota in intrauterine adhesion by high-throughput sequencing
Source: PubMed Central journal article supplement — Ann Transl Med. 2021 Feb;9(3):195. doi: 10.21037/atm-20-2813 (PMC7940878; doi:10.21037/atm-20-2813), 2021-02
Supplement: atm-09-03-195-coif.pdf [file atm-09-03-195-coif.pdf]

## ICMJE Form for Disclosure of Potential Conflicts of Interest

### Instructions

The purpose of this form is to provide readers of your manuscript with information about your other interests that could influence how they receive and understand your work. The form is designed to be completed electronically and stored electronically. It contains programming that allows appropriate data display. Each author should submit a separate form and is responsible for the accuracy and completeness of the submitted information. The form is in six parts.

#### 1. Identifying information.

#### 2. The work under consideration for publication.

This section asks for information about the work that you have submitted for publication. The time frame for this reporting is that of the work itself, from the initial conception and planning to the present. The requested information is about resources that you received, either directly or indirectly (via your institution), to enable you to complete the work. Checking "No" means that you did the work without receiving any financial support from any third party -- that is, the work was supported by funds from the same institution that pays your salary and that institution did not receive third-party funds with which to pay you. If you or your institution received funds from a third party to support the work, such as a government granting agency, charitable foundation or commercial sponsor, check "Yes".

#### 3. Relevant financial activities outside the submitted work.

This section asks about your financial relationships with entities in the bio-medical arena that could be perceived to influence, or that give the appearance of potentially influencing, what you wrote in the submitted work. You should disclose interactions with ANY entity that could be considered broadly relevant to the work. For example, if your article is about testing an epidermal growth factor receptor (EGFR) antagonist in lung cancer, you should report all associations with entities pursuing diagnostic or therapeutic strategies in cancer in general, not just in the area of EGFR or lung cancer.

Report all sources of revenue paid (or promised to be paid) directly to you or your institution on your behalf over the 36 months prior to submission of the work. This should include all monies from sources with relevance to the submitted work, not just monies from the entity that sponsored the research. Please note that your interactions with the work's sponsor that are outside the submitted work should also be listed here. If there is any question, it is usually better to disclose a relationship than not to do so.

For grants you have received for work outside the submitted work, you should disclose support ONLY from entities that could be perceived to be affected financially by the published work, such as drug companies, or foundations supported by entities that could be perceived to have a financial stake in the outcome. Public funding sources, such as government agencies, charitable foundations or academic institutions, need not be disclosed. For example, if a government agency sponsored a study in which you have been involved and drugs were provided by a pharmaceutical company, you need only list the pharmaceutical company.

#### 4. Intellectual Property.

This section asks about patents and copyrights, whether pending, issued, licensed and/or receiving royalties.

#### 5. Relationships not covered above.

Use this section to report other relationships or activities that readers could perceive to have influenced, or that give the appearance of potentially influencing, what you wrote in the submitted work.

#### Definitions.

**Entity:** government agency, foundation, commercial sponsor, academic institution, etc.

**Grant:** A grant from an entity, generally [but not always] paid to your organization

**Personal Fees:** Monies paid to you for services rendered, generally honoraria, royalties, or fees for consulting, lectures, speakers bureaus, expert testimony, employment, or other affiliations

**Non-Financial Support:** Examples include drugs/equipment supplied by the entity, travel paid by the entity, writing assistance, administrative support, etc.

**Other:** Anything not covered under the previous three boxes

**Pending:** The patent has been filed but not issued

**Issued:** The patent has been issued by the agency

**Licensed:** The patent has been licensed to an entity, whether earning royalties or not

**Royalties:** Funds are coming in to you or your institution due to your patent

## ICMJE Form for Disclosure of Potential Conflicts of Interest

### Section 1. Identifying Information

1. Given Name (First Name)

Yuanli

2. Surname (Last Name)

He

3. Date

12-August-2020

4. Are you the corresponding author?

Yes  No

5. Manuscript Title

Relevance of assessing the endometrial microbiota in intrauterine adhesion using high-throughput sequencing

6. Manuscript Identifying Number (if you know it)

ATM-20-2813

### Section 2. The Work Under Consideration for Publication

Did you or your institution **at any time** receive payment or services from a third party (government, commercial, private foundation, etc.) for any aspect of the submitted work (including but not limited to grants, data monitoring board, study design, manuscript preparation, statistical analysis, etc.)?

Are there any relevant conflicts of interest?  Yes  No

### Section 3. Relevant financial activities outside the submitted work.

Place a check in the appropriate boxes in the table to indicate whether you have financial relationships (regardless of amount of compensation) with entities as described in the instructions. Use one line for each entity; add as many lines as you need by clicking the "Add +" box. You should report relationships that were **present during the 36 months prior to publication**.

Are there any relevant conflicts of interest?  Yes  No

### Section 4. Intellectual Property -- Patents & Copyrights

Do you have any patents, whether planned, pending or issued, broadly relevant to the work?  Yes  No

## ICMJE Form for Disclosure of Potential Conflicts of Interest

---

### Section 5. Relationships not covered above

Are there other relationships or activities that readers could perceive to have influenced, or that give the appearance of potentially influencing, what you wrote in the submitted work?

- Yes, the following relationships/conditions/circumstances are present (explain below):
- No other relationships/conditions/circumstances that present a potential conflict of interest

At the time of manuscript acceptance, journals will ask authors to confirm and, if necessary, update their disclosure statements. On occasion, journals may ask authors to disclose further information about reported relationships.

### Section 6. Disclosure Statement

Based on the above disclosures, this form will automatically generate a disclosure statement, which will appear in the box below.

All authors have completed the ICMJE uniform disclosure form. The authors have no conflicts of interest to declare.

### Evaluation and Feedback

Please visit <http://www.icmje.org/cgi-bin/feedback> to provide feedback on your experience with completing this form.

## ICMJE Form for Disclosure of Potential Conflicts of Interest

### Instructions

The purpose of this form is to provide readers of your manuscript with information about your other interests that could influence how they receive and understand your work. The form is designed to be completed electronically and stored electronically. It contains programming that allows appropriate data display. Each author should submit a separate form and is responsible for the accuracy and completeness of the submitted information. The form is in six parts.

#### 1. Identifying information.

#### 2. The work under consideration for publication.

This section asks for information about the work that you have submitted for publication. The time frame for this reporting is that of the work itself, from the initial conception and planning to the present. The requested information is about resources that you received, either directly or indirectly (via your institution), to enable you to complete the work. Checking "No" means that you did the work without receiving any financial support from any third party -- that is, the work was supported by funds from the same institution that pays your salary and that institution did not receive third-party funds with which to pay you. If you or your institution received funds from a third party to support the work, such as a government granting agency, charitable foundation or commercial sponsor, check "Yes".

#### 3. Relevant financial activities outside the submitted work.

This section asks about your financial relationships with entities in the bio-medical arena that could be perceived to influence, or that give the appearance of potentially influencing, what you wrote in the submitted work. You should disclose interactions with ANY entity that could be considered broadly relevant to the work. For example, if your article is about testing an epidermal growth factor receptor (EGFR) antagonist in lung cancer, you should report all associations with entities pursuing diagnostic or therapeutic strategies in cancer in general, not just in the area of EGFR or lung cancer.

Report all sources of revenue paid (or promised to be paid) directly to you or your institution on your behalf over the 36 months prior to submission of the work. This should include all monies from sources with relevance to the submitted work, not just monies from the entity that sponsored the research. Please note that your interactions with the work's sponsor that are outside the submitted work should also be listed here. If there is any question, it is usually better to disclose a relationship than not to do so.

For grants you have received for work outside the submitted work, you should disclose support ONLY from entities that could be perceived to be affected financially by the published work, such as drug companies, or foundations supported by entities that could be perceived to have a financial stake in the outcome. Public funding sources, such as government agencies, charitable foundations or academic institutions, need not be disclosed. For example, if a government agency sponsored a study in which you have been involved and drugs were provided by a pharmaceutical company, you need only list the pharmaceutical company.

#### 4. Intellectual Property.

This section asks about patents and copyrights, whether pending, issued, licensed and/or receiving royalties.

#### 5. Relationships not covered above.

Use this section to report other relationships or activities that readers could perceive to have influenced, or that give the appearance of potentially influencing, what you wrote in the submitted work.

#### Definitions.

**Entity:** government agency, foundation, commercial sponsor, academic institution, etc.

**Grant:** A grant from an entity, generally [but not always] paid to your organization

**Personal Fees:** Monies paid to you for services rendered, generally honoraria, royalties, or fees for consulting, lectures, speakers bureaus, expert testimony, employment, or other affiliations

**Non-Financial Support:** Examples include drugs/equipment supplied by the entity, travel paid by the entity, writing assistance, administrative support, etc.

**Other:** Anything not covered under the previous three boxes

**Pending:** The patent has been filed but not issued

**Issued:** The patent has been issued by the agency

**Licensed:** The patent has been licensed to an entity, whether earning royalties or not

**Royalties:** Funds are coming in to you or your institution due to your patent

## ICMJE Form for Disclosure of Potential Conflicts of Interest

### Section 1. Identifying Information

|                                                                                                                                    |                                                                     |                                                                  |
|------------------------------------------------------------------------------------------------------------------------------------|---------------------------------------------------------------------|------------------------------------------------------------------|
| 1. Given Name (First Name)<br>Tianmei                                                                                              | 2. Surname (Last Name)<br>Qiu                                       | 3. Date<br>12-August-2020                                        |
| 4. Are you the corresponding author?                                                                                               | <input type="checkbox"/> Yes <input checked="" type="checkbox"/> No | Corresponding Author's Name<br>Huihua Cai, Mubiao Liu, Yuanli He |
| 5. Manuscript Title<br>Relevance of assessing the endometrial microbiota in intrauterine adhesion using high-throughput sequencing |                                                                     |                                                                  |
| 6. Manuscript Identifying Number (if you know it)<br>ATM-20-2813                                                                   |                                                                     |                                                                  |

### Section 2. The Work Under Consideration for Publication

Did you or your institution **at any time** receive payment or services from a third party (government, commercial, private foundation, etc.) for any aspect of the submitted work (including but not limited to grants, data monitoring board, study design, manuscript preparation, statistical analysis, etc.)?

Are there any relevant conflicts of interest?  Yes  No

### Section 3. Relevant financial activities outside the submitted work.

Place a check in the appropriate boxes in the table to indicate whether you have financial relationships (regardless of amount of compensation) with entities as described in the instructions. Use one line for each entity; add as many lines as you need by clicking the "Add +" box. You should report relationships that were **present during the 36 months prior to publication**.

Are there any relevant conflicts of interest?  Yes  No

### Section 4. Intellectual Property -- Patents & Copyrights

Do you have any patents, whether planned, pending or issued, broadly relevant to the work?  Yes  No

## ICMJE Form for Disclosure of Potential Conflicts of Interest

---

### Section 5. Relationships not covered above

Are there other relationships or activities that readers could perceive to have influenced, or that give the appearance of potentially influencing, what you wrote in the submitted work?

- Yes, the following relationships/conditions/circumstances are present (explain below):
- No other relationships/conditions/circumstances that present a potential conflict of interest

At the time of manuscript acceptance, journals will ask authors to confirm and, if necessary, update their disclosure statements. On occasion, journals may ask authors to disclose further information about reported relationships.

### Section 6. Disclosure Statement

Based on the above disclosures, this form will automatically generate a disclosure statement, which will appear in the box below.

All authors have completed the ICMJE uniform disclosure form. The authors have no conflicts of interest to declare.

### Evaluation and Feedback

Please visit <http://www.icmje.org/cgi-bin/feedback> to provide feedback on your experience with completing this form.

## ICMJE Form for Disclosure of Potential Conflicts of Interest

### Instructions

The purpose of this form is to provide readers of your manuscript with information about your other interests that could influence how they receive and understand your work. The form is designed to be completed electronically and stored electronically. It contains programming that allows appropriate data display. Each author should submit a separate form and is responsible for the accuracy and completeness of the submitted information. The form is in six parts.

#### 1. Identifying information.

#### 2. The work under consideration for publication.

This section asks for information about the work that you have submitted for publication. The time frame for this reporting is that of the work itself, from the initial conception and planning to the present. The requested information is about resources that you received, either directly or indirectly (via your institution), to enable you to complete the work. Checking "No" means that you did the work without receiving any financial support from any third party -- that is, the work was supported by funds from the same institution that pays your salary and that institution did not receive third-party funds with which to pay you. If you or your institution received funds from a third party to support the work, such as a government granting agency, charitable foundation or commercial sponsor, check "Yes".

#### 3. Relevant financial activities outside the submitted work.

This section asks about your financial relationships with entities in the bio-medical arena that could be perceived to influence, or that give the appearance of potentially influencing, what you wrote in the submitted work. You should disclose interactions with ANY entity that could be considered broadly relevant to the work. For example, if your article is about testing an epidermal growth factor receptor (EGFR) antagonist in lung cancer, you should report all associations with entities pursuing diagnostic or therapeutic strategies in cancer in general, not just in the area of EGFR or lung cancer.

Report all sources of revenue paid (or promised to be paid) directly to you or your institution on your behalf over the 36 months prior to submission of the work. This should include all monies from sources with relevance to the submitted work, not just monies from the entity that sponsored the research. Please note that your interactions with the work's sponsor that are outside the submitted work should also be listed here. If there is any question, it is usually better to disclose a relationship than not to do so.

For grants you have received for work outside the submitted work, you should disclose support ONLY from entities that could be perceived to be affected financially by the published work, such as drug companies, or foundations supported by entities that could be perceived to have a financial stake in the outcome. Public funding sources, such as government agencies, charitable foundations or academic institutions, need not be disclosed. For example, if a government agency sponsored a study in which you have been involved and drugs were provided by a pharmaceutical company, you need only list the pharmaceutical company.

#### 4. Intellectual Property.

This section asks about patents and copyrights, whether pending, issued, licensed and/or receiving royalties.

#### 5. Relationships not covered above.

Use this section to report other relationships or activities that readers could perceive to have influenced, or that give the appearance of potentially influencing, what you wrote in the submitted work.

#### Definitions.

**Entity:** government agency, foundation, commercial sponsor, academic institution, etc.

**Grant:** A grant from an entity, generally [but not always] paid to your organization

**Personal Fees:** Monies paid to you for services rendered, generally honoraria, royalties, or fees for consulting, lectures, speakers bureaus, expert testimony, employment, or other affiliations

**Non-Financial Support:** Examples include drugs/equipment supplied by the entity, travel paid by the entity, writing assistance, administrative support, etc.

**Other:** Anything not covered under the previous three boxes

**Pending:** The patent has been filed but not issued

**Issued:** The patent has been issued by the agency

**Licensed:** The patent has been licensed to an entity, whether earning royalties or not

**Royalties:** Funds are coming in to you or your institution due to your patent

## ICMJE Form for Disclosure of Potential Conflicts of Interest

### Section 1. Identifying Information

1. Given Name (First Name)

Mubiao

2. Surname (Last Name)

Liu

3. Date

12-August-2020

4. Are you the corresponding author?

Yes  No

5. Manuscript Title

Relevance of assessing the endometrial microbiota in intrauterine adhesion using high-throughput sequencing

6. Manuscript Identifying Number (if you know it)

ATM-20-2813

### Section 2. The Work Under Consideration for Publication

Did you or your institution **at any time** receive payment or services from a third party (government, commercial, private foundation, etc.) for any aspect of the submitted work (including but not limited to grants, data monitoring board, study design, manuscript preparation, statistical analysis, etc.)?

Are there any relevant conflicts of interest?  Yes  No

### Section 3. Relevant financial activities outside the submitted work.

Place a check in the appropriate boxes in the table to indicate whether you have financial relationships (regardless of amount of compensation) with entities as described in the instructions. Use one line for each entity; add as many lines as you need by clicking the "Add +" box. You should report relationships that were **present during the 36 months prior to publication**.

Are there any relevant conflicts of interest?  Yes  No

### Section 4. Intellectual Property -- Patents & Copyrights

Do you have any patents, whether planned, pending or issued, broadly relevant to the work?  Yes  No



## ICMJE Form for Disclosure of Potential Conflicts of Interest

---

### Section 5. Relationships not covered above

Are there other relationships or activities that readers could perceive to have influenced, or that give the appearance of potentially influencing, what you wrote in the submitted work?

- Yes, the following relationships/conditions/circumstances are present (explain below):
- No other relationships/conditions/circumstances that present a potential conflict of interest

At the time of manuscript acceptance, journals will ask authors to confirm and, if necessary, update their disclosure statements. On occasion, journals may ask authors to disclose further information about reported relationships.

### Section 6. Disclosure Statement

Based on the above disclosures, this form will automatically generate a disclosure statement, which will appear in the box below.

All authors have completed the ICMJE uniform disclosure form. The authors have no conflicts of interest to declare.

### Evaluation and Feedback

Please visit <http://www.icmje.org/cgi-bin/feedback> to provide feedback on your experience with completing this form.

## ICMJE Form for Disclosure of Potential Conflicts of Interest

### Instructions

The purpose of this form is to provide readers of your manuscript with information about your other interests that could influence how they receive and understand your work. The form is designed to be completed electronically and stored electronically. It contains programming that allows appropriate data display. Each author should submit a separate form and is responsible for the accuracy and completeness of the submitted information. The form is in six parts.

#### 1. Identifying information.

#### 2. The work under consideration for publication.

This section asks for information about the work that you have submitted for publication. The time frame for this reporting is that of the work itself, from the initial conception and planning to the present. The requested information is about resources that you received, either directly or indirectly (via your institution), to enable you to complete the work. Checking "No" means that you did the work without receiving any financial support from any third party -- that is, the work was supported by funds from the same institution that pays your salary and that institution did not receive third-party funds with which to pay you. If you or your institution received funds from a third party to support the work, such as a government granting agency, charitable foundation or commercial sponsor, check "Yes".

#### 3. Relevant financial activities outside the submitted work.

This section asks about your financial relationships with entities in the bio-medical arena that could be perceived to influence, or that give the appearance of potentially influencing, what you wrote in the submitted work. You should disclose interactions with ANY entity that could be considered broadly relevant to the work. For example, if your article is about testing an epidermal growth factor receptor (EGFR) antagonist in lung cancer, you should report all associations with entities pursuing diagnostic or therapeutic strategies in cancer in general, not just in the area of EGFR or lung cancer.

Report all sources of revenue paid (or promised to be paid) directly to you or your institution on your behalf over the 36 months prior to submission of the work. This should include all monies from sources with relevance to the submitted work, not just monies from the entity that sponsored the research. Please note that your interactions with the work's sponsor that are outside the submitted work should also be listed here. If there is any question, it is usually better to disclose a relationship than not to do so.

For grants you have received for work outside the submitted work, you should disclose support ONLY from entities that could be perceived to be affected financially by the published work, such as drug companies, or foundations supported by entities that could be perceived to have a financial stake in the outcome. Public funding sources, such as government agencies, charitable foundations or academic institutions, need not be disclosed. For example, if a government agency sponsored a study in which you have been involved and drugs were provided by a pharmaceutical company, you need only list the pharmaceutical company.

#### 4. Intellectual Property.

This section asks about patents and copyrights, whether pending, issued, licensed and/or receiving royalties.

#### 5. Relationships not covered above.

Use this section to report other relationships or activities that readers could perceive to have influenced, or that give the appearance of potentially influencing, what you wrote in the submitted work.

#### Definitions.

**Entity:** government agency, foundation, commercial sponsor, academic institution, etc.

**Grant:** A grant from an entity, generally [but not always] paid to your organization

**Personal Fees:** Monies paid to you for services rendered, generally honoraria, royalties, or fees for consulting, lectures, speakers bureaus, expert testimony, employment, or other affiliations

**Non-Financial Support:** Examples include drugs/equipment supplied by the entity, travel paid by the entity, writing assistance, administrative support, etc.

**Other:** Anything not covered under the previous three boxes

**Pending:** The patent has been filed but not issued

**Issued:** The patent has been issued by the agency

**Licensed:** The patent has been licensed to an entity, whether earning royalties or not

**Royalties:** Funds are coming in to you or your institution due to your patent

## ICMJE Form for Disclosure of Potential Conflicts of Interest

### Section 1. Identifying Information

|                                                                                                                                    |                                                                     |                                                                  |
|------------------------------------------------------------------------------------------------------------------------------------|---------------------------------------------------------------------|------------------------------------------------------------------|
| 1. Given Name (First Name)<br>Hongwei                                                                                              | 2. Surname (Last Name)<br>Zhou                                      | 3. Date<br>12-August-2020                                        |
| 4. Are you the corresponding author?                                                                                               | <input type="checkbox"/> Yes <input checked="" type="checkbox"/> No | Corresponding Author's Name<br>Huihua Cai, Mubiao Liu, Yuanli He |
| 5. Manuscript Title<br>Relevance of assessing the endometrial microbiota in intrauterine adhesion using high-throughput sequencing |                                                                     |                                                                  |
| 6. Manuscript Identifying Number (if you know it)<br>ATM-20-2813                                                                   |                                                                     |                                                                  |

### Section 2. The Work Under Consideration for Publication

Did you or your institution **at any time** receive payment or services from a third party (government, commercial, private foundation, etc.) for any aspect of the submitted work (including but not limited to grants, data monitoring board, study design, manuscript preparation, statistical analysis, etc.)?

Are there any relevant conflicts of interest?  Yes  No

### Section 3. Relevant financial activities outside the submitted work.

Place a check in the appropriate boxes in the table to indicate whether you have financial relationships (regardless of amount of compensation) with entities as described in the instructions. Use one line for each entity; add as many lines as you need by clicking the "Add +" box. You should report relationships that were **present during the 36 months prior to publication**.

Are there any relevant conflicts of interest?  Yes  No

### Section 4. Intellectual Property -- Patents & Copyrights

Do you have any patents, whether planned, pending or issued, broadly relevant to the work?  Yes  No

## ICMJE Form for Disclosure of Potential Conflicts of Interest

---

### Section 5. Relationships not covered above

Are there other relationships or activities that readers could perceive to have influenced, or that give the appearance of potentially influencing, what you wrote in the submitted work?

- Yes, the following relationships/conditions/circumstances are present (explain below):
- No other relationships/conditions/circumstances that present a potential conflict of interest

At the time of manuscript acceptance, journals will ask authors to confirm and, if necessary, update their disclosure statements. On occasion, journals may ask authors to disclose further information about reported relationships.

### Section 6. Disclosure Statement

Based on the above disclosures, this form will automatically generate a disclosure statement, which will appear in the box below.

All authors have completed the ICMJE uniform disclosure form. The authors have no conflicts of interest to declare.

### Evaluation and Feedback

Please visit <http://www.icmje.org/cgi-bin/feedback> to provide feedback on your experience with completing this form.

## ICMJE Form for Disclosure of Potential Conflicts of Interest

### Instructions

The purpose of this form is to provide readers of your manuscript with information about your other interests that could influence how they receive and understand your work. The form is designed to be completed electronically and stored electronically. It contains programming that allows appropriate data display. Each author should submit a separate form and is responsible for the accuracy and completeness of the submitted information. The form is in six parts.

#### 1. Identifying information.

#### 2. The work under consideration for publication.

This section asks for information about the work that you have submitted for publication. The time frame for this reporting is that of the work itself, from the initial conception and planning to the present. The requested information is about resources that you received, either directly or indirectly (via your institution), to enable you to complete the work. Checking "No" means that you did the work without receiving any financial support from any third party -- that is, the work was supported by funds from the same institution that pays your salary and that institution did not receive third-party funds with which to pay you. If you or your institution received funds from a third party to support the work, such as a government granting agency, charitable foundation or commercial sponsor, check "Yes".

#### 3. Relevant financial activities outside the submitted work.

This section asks about your financial relationships with entities in the bio-medical arena that could be perceived to influence, or that give the appearance of potentially influencing, what you wrote in the submitted work. You should disclose interactions with ANY entity that could be considered broadly relevant to the work. For example, if your article is about testing an epidermal growth factor receptor (EGFR) antagonist in lung cancer, you should report all associations with entities pursuing diagnostic or therapeutic strategies in cancer in general, not just in the area of EGFR or lung cancer.

Report all sources of revenue paid (or promised to be paid) directly to you or your institution on your behalf over the 36 months prior to submission of the work. This should include all monies from sources with relevance to the submitted work, not just monies from the entity that sponsored the research. Please note that your interactions with the work's sponsor that are outside the submitted work should also be listed here. If there is any question, it is usually better to disclose a relationship than not to do so.

For grants you have received for work outside the submitted work, you should disclose support ONLY from entities that could be perceived to be affected financially by the published work, such as drug companies, or foundations supported by entities that could be perceived to have a financial stake in the outcome. Public funding sources, such as government agencies, charitable foundations or academic institutions, need not be disclosed. For example, if a government agency sponsored a study in which you have been involved and drugs were provided by a pharmaceutical company, you need only list the pharmaceutical company.

#### 4. Intellectual Property.

This section asks about patents and copyrights, whether pending, issued, licensed and/or receiving royalties.

#### 5. Relationships not covered above.

Use this section to report other relationships or activities that readers could perceive to have influenced, or that give the appearance of potentially influencing, what you wrote in the submitted work.

#### Definitions.

**Entity:** government agency, foundation, commercial sponsor, academic institution, etc.

**Grant:** A grant from an entity, generally [but not always] paid to your organization

**Personal Fees:** Monies paid to you for services rendered, generally honoraria, royalties, or fees for consulting, lectures, speakers bureaus, expert testimony, employment, or other affiliations

**Non-Financial Support:** Examples include drugs/equipment supplied by the entity, travel paid by the entity, writing assistance, administrative support, etc.

**Other:** Anything not covered under the previous three boxes

**Pending:** The patent has been filed but not issued

**Issued:** The patent has been issued by the agency

**Licensed:** The patent has been licensed to an entity, whether earning royalties or not

**Royalties:** Funds are coming in to you or your institution due to your patent

## ICMJE Form for Disclosure of Potential Conflicts of Interest

### Section 1. Identifying Information

|                                                                                                                                    |                                                                     |                                                                  |
|------------------------------------------------------------------------------------------------------------------------------------|---------------------------------------------------------------------|------------------------------------------------------------------|
| 1. Given Name (First Name)<br>HuaFang                                                                                              | 2. Surname (Last Name)<br>Sheng                                     | 3. Date<br>12-August-2020                                        |
| 4. Are you the corresponding author?                                                                                               | <input type="checkbox"/> Yes <input checked="" type="checkbox"/> No | Corresponding Author's Name<br>Huihua Cai, Mubiao Liu, Yuanli He |
| 5. Manuscript Title<br>Relevance of assessing the endometrial microbiota in intrauterine adhesion using high-throughput sequencing |                                                                     |                                                                  |
| 6. Manuscript Identifying Number (if you know it)<br>ATM-20-2813                                                                   |                                                                     |                                                                  |

### Section 2. The Work Under Consideration for Publication

Did you or your institution **at any time** receive payment or services from a third party (government, commercial, private foundation, etc.) for any aspect of the submitted work (including but not limited to grants, data monitoring board, study design, manuscript preparation, statistical analysis, etc.)?

Are there any relevant conflicts of interest?  Yes  No

### Section 3. Relevant financial activities outside the submitted work.

Place a check in the appropriate boxes in the table to indicate whether you have financial relationships (regardless of amount of compensation) with entities as described in the instructions. Use one line for each entity; add as many lines as you need by clicking the "Add +" box. You should report relationships that were **present during the 36 months prior to publication**.

Are there any relevant conflicts of interest?  Yes  No

### Section 4. Intellectual Property -- Patents & Copyrights

Do you have any patents, whether planned, pending or issued, broadly relevant to the work?  Yes  No

## ICMJE Form for Disclosure of Potential Conflicts of Interest

---

### Section 5. Relationships not covered above

Are there other relationships or activities that readers could perceive to have influenced, or that give the appearance of potentially influencing, what you wrote in the submitted work?

- Yes, the following relationships/conditions/circumstances are present (explain below):
- No other relationships/conditions/circumstances that present a potential conflict of interest

At the time of manuscript acceptance, journals will ask authors to confirm and, if necessary, update their disclosure statements. On occasion, journals may ask authors to disclose further information about reported relationships.

### Section 6. Disclosure Statement

Based on the above disclosures, this form will automatically generate a disclosure statement, which will appear in the box below.

All authors have completed the ICMJE uniform disclosure form. The authors have no conflicts of interest to declare.

### Evaluation and Feedback

Please visit <http://www.icmje.org/cgi-bin/feedback> to provide feedback on your experience with completing this form.

## ICMJE Form for Disclosure of Potential Conflicts of Interest

### Instructions

The purpose of this form is to provide readers of your manuscript with information about your other interests that could influence how they receive and understand your work. The form is designed to be completed electronically and stored electronically. It contains programming that allows appropriate data display. Each author should submit a separate form and is responsible for the accuracy and completeness of the submitted information. The form is in six parts.

#### 1. Identifying information.

#### 2. The work under consideration for publication.

This section asks for information about the work that you have submitted for publication. The time frame for this reporting is that of the work itself, from the initial conception and planning to the present. The requested information is about resources that you received, either directly or indirectly (via your institution), to enable you to complete the work. Checking "No" means that you did the work without receiving any financial support from any third party -- that is, the work was supported by funds from the same institution that pays your salary and that institution did not receive third-party funds with which to pay you. If you or your institution received funds from a third party to support the work, such as a government granting agency, charitable foundation or commercial sponsor, check "Yes".

#### 3. Relevant financial activities outside the submitted work.

This section asks about your financial relationships with entities in the bio-medical arena that could be perceived to influence, or that give the appearance of potentially influencing, what you wrote in the submitted work. You should disclose interactions with ANY entity that could be considered broadly relevant to the work. For example, if your article is about testing an epidermal growth factor receptor (EGFR) antagonist in lung cancer, you should report all associations with entities pursuing diagnostic or therapeutic strategies in cancer in general, not just in the area of EGFR or lung cancer.

Report all sources of revenue paid (or promised to be paid) directly to you or your institution on your behalf over the 36 months prior to submission of the work. This should include all monies from sources with relevance to the submitted work, not just monies from the entity that sponsored the research. Please note that your interactions with the work's sponsor that are outside the submitted work should also be listed here. If there is any question, it is usually better to disclose a relationship than not to do so.

For grants you have received for work outside the submitted work, you should disclose support ONLY from entities that could be perceived to be affected financially by the published work, such as drug companies, or foundations supported by entities that could be perceived to have a financial stake in the outcome. Public funding sources, such as government agencies, charitable foundations or academic institutions, need not be disclosed. For example, if a government agency sponsored a study in which you have been involved and drugs were provided by a pharmaceutical company, you need only list the pharmaceutical company.

#### 4. Intellectual Property.

This section asks about patents and copyrights, whether pending, issued, licensed and/or receiving royalties.

#### 5. Relationships not covered above.

Use this section to report other relationships or activities that readers could perceive to have influenced, or that give the appearance of potentially influencing, what you wrote in the submitted work.

#### Definitions.

**Entity:** government agency, foundation, commercial sponsor, academic institution, etc.

**Grant:** A grant from an entity, generally [but not always] paid to your organization

**Personal Fees:** Monies paid to you for services rendered, generally honoraria, royalties, or fees for consulting, lectures, speakers bureaus, expert testimony, employment, or other affiliations

**Non-Financial Support:** Examples include drugs/equipment supplied by the entity, travel paid by the entity, writing assistance, administrative support, etc.

**Other:** Anything not covered under the previous three boxes

**Pending:** The patent has been filed but not issued

**Issued:** The patent has been issued by the agency

**Licensed:** The patent has been licensed to an entity, whether earning royalties or not

**Royalties:** Funds are coming in to you or your institution due to your patent



## ICMJE Form for Disclosure of Potential Conflicts of Interest

### Section 1. Identifying Information

1. Given Name (First Name)

Lei

2. Surname (Last Name)

Liu

3. Date

12-August-2020

4. Are you the corresponding author?

Yes  No

Corresponding Author's Name

Huihua Cai, Mubiao Liu, Yuanli He

5. Manuscript Title

Relevance of assessing the endometrial microbiota in intrauterine adhesion using high-throughput sequencing

6. Manuscript Identifying Number (if you know it)

ATM-20-2813

### Section 2. The Work Under Consideration for Publication

Did you or your institution **at any time** receive payment or services from a third party (government, commercial, private foundation, etc.) for any aspect of the submitted work (including but not limited to grants, data monitoring board, study design, manuscript preparation, statistical analysis, etc.)?

Are there any relevant conflicts of interest?  Yes  No

### Section 3. Relevant financial activities outside the submitted work.

Place a check in the appropriate boxes in the table to indicate whether you have financial relationships (regardless of amount of compensation) with entities as described in the instructions. Use one line for each entity; add as many lines as you need by clicking the "Add +" box. You should report relationships that were **present during the 36 months prior to publication**.

Are there any relevant conflicts of interest?  Yes  No

### Section 4. Intellectual Property -- Patents & Copyrights

Do you have any patents, whether planned, pending or issued, broadly relevant to the work?  Yes  No

## ICMJE Form for Disclosure of Potential Conflicts of Interest

---

### Section 5. Relationships not covered above

Are there other relationships or activities that readers could perceive to have influenced, or that give the appearance of potentially influencing, what you wrote in the submitted work?

- Yes, the following relationships/conditions/circumstances are present (explain below):
- No other relationships/conditions/circumstances that present a potential conflict of interest

At the time of manuscript acceptance, journals will ask authors to confirm and, if necessary, update their disclosure statements. On occasion, journals may ask authors to disclose further information about reported relationships.

### Section 6. Disclosure Statement

Based on the above disclosures, this form will automatically generate a disclosure statement, which will appear in the box below.

All authors have completed the ICMJE uniform disclosure form. The authors have no conflicts of interest to declare.

### Evaluation and Feedback

Please visit <http://www.icmje.org/cgi-bin/feedback> to provide feedback on your experience with completing this form.

## ICMJE Form for Disclosure of Potential Conflicts of Interest

### Instructions

The purpose of this form is to provide readers of your manuscript with information about your other interests that could influence how they receive and understand your work. The form is designed to be completed electronically and stored electronically. It contains programming that allows appropriate data display. Each author should submit a separate form and is responsible for the accuracy and completeness of the submitted information. The form is in six parts.

#### 1. Identifying information.

#### 2. The work under consideration for publication.

This section asks for information about the work that you have submitted for publication. The time frame for this reporting is that of the work itself, from the initial conception and planning to the present. The requested information is about resources that you received, either directly or indirectly (via your institution), to enable you to complete the work. Checking "No" means that you did the work without receiving any financial support from any third party -- that is, the work was supported by funds from the same institution that pays your salary and that institution did not receive third-party funds with which to pay you. If you or your institution received funds from a third party to support the work, such as a government granting agency, charitable foundation or commercial sponsor, check "Yes".

#### 3. Relevant financial activities outside the submitted work.

This section asks about your financial relationships with entities in the bio-medical arena that could be perceived to influence, or that give the appearance of potentially influencing, what you wrote in the submitted work. You should disclose interactions with ANY entity that could be considered broadly relevant to the work. For example, if your article is about testing an epidermal growth factor receptor (EGFR) antagonist in lung cancer, you should report all associations with entities pursuing diagnostic or therapeutic strategies in cancer in general, not just in the area of EGFR or lung cancer.

Report all sources of revenue paid (or promised to be paid) directly to you or your institution on your behalf over the 36 months prior to submission of the work. This should include all monies from sources with relevance to the submitted work, not just monies from the entity that sponsored the research. Please note that your interactions with the work's sponsor that are outside the submitted work should also be listed here. If there is any question, it is usually better to disclose a relationship than not to do so.

For grants you have received for work outside the submitted work, you should disclose support ONLY from entities that could be perceived to be affected financially by the published work, such as drug companies, or foundations supported by entities that could be perceived to have a financial stake in the outcome. Public funding sources, such as government agencies, charitable foundations or academic institutions, need not be disclosed. For example, if a government agency sponsored a study in which you have been involved and drugs were provided by a pharmaceutical company, you need only list the pharmaceutical company.

#### 4. Intellectual Property.

This section asks about patents and copyrights, whether pending, issued, licensed and/or receiving royalties.

#### 5. Relationships not covered above.

Use this section to report other relationships or activities that readers could perceive to have influenced, or that give the appearance of potentially influencing, what you wrote in the submitted work.

#### Definitions.

**Entity:** government agency, foundation, commercial sponsor, academic institution, etc.

**Grant:** A grant from an entity, generally [but not always] paid to your organization

**Personal Fees:** Monies paid to you for services rendered, generally honoraria, royalties, or fees for consulting, lectures, speakers bureaus, expert testimony, employment, or other affiliations

**Non-Financial Support:** Examples include drugs/equipment supplied by the entity, travel paid by the entity, writing assistance, administrative support, etc.

**Other:** Anything not covered under the previous three boxes

**Pending:** The patent has been filed but not issued

**Issued:** The patent has been issued by the agency

**Licensed:** The patent has been licensed to an entity, whether earning royalties or not

**Royalties:** Funds are coming in to you or your institution due to your patent

## ICMJE Form for Disclosure of Potential Conflicts of Interest

### Section 1. Identifying Information

1. Given Name (First Name)

Huihua

2. Surname (Last Name)

Cai

3. Date

12-August-2020

4. Are you the corresponding author?

Yes  No

5. Manuscript Title

Relevance of assessing the endometrial microbiota in intrauterine adhesion using high-throughput sequencing

6. Manuscript Identifying Number (if you know it)

ATM-20-2813

### Section 2. The Work Under Consideration for Publication

Did you or your institution **at any time** receive payment or services from a third party (government, commercial, private foundation, etc.) for any aspect of the submitted work (including but not limited to grants, data monitoring board, study design, manuscript preparation, statistical analysis, etc.)?

Are there any relevant conflicts of interest?  Yes  No

### Section 3. Relevant financial activities outside the submitted work.

Place a check in the appropriate boxes in the table to indicate whether you have financial relationships (regardless of amount of compensation) with entities as described in the instructions. Use one line for each entity; add as many lines as you need by clicking the "Add +" box. You should report relationships that were **present during the 36 months prior to publication**.

Are there any relevant conflicts of interest?  Yes  No

### Section 4. Intellectual Property -- Patents & Copyrights

Do you have any patents, whether planned, pending or issued, broadly relevant to the work?  Yes  No

## ICMJE Form for Disclosure of Potential Conflicts of Interest

---

### Section 5. Relationships not covered above

Are there other relationships or activities that readers could perceive to have influenced, or that give the appearance of potentially influencing, what you wrote in the submitted work?

- Yes, the following relationships/conditions/circumstances are present (explain below):
- No other relationships/conditions/circumstances that present a potential conflict of interest

At the time of manuscript acceptance, journals will ask authors to confirm and, if necessary, update their disclosure statements. On occasion, journals may ask authors to disclose further information about reported relationships.

### Section 6. Disclosure Statement

Based on the above disclosures, this form will automatically generate a disclosure statement, which will appear in the box below.

All authors have completed the ICMJE uniform disclosure form. The authors have no conflicts of interest to declare.

### Evaluation and Feedback

Please visit <http://www.icmje.org/cgi-bin/feedback> to provide feedback on your experience with completing this form.

Journal: *Annals of Translational Medicine*

Manuscript ID: ATM-20-5293

doi: 10.21037/atm-20-5293

Title: Irbesartan inhibits metastasis by interrupting the adherence of tumor cell to endothelial cell induced by angiotensin II in hepatocellular carcinoma

Corresponding author: Zhao-You Tang

Dear Dr. Tang,

The proof of your manuscript is attached on the following pages. Please read through the document carefully to check for accuracy, reference citations, and figures and tables. Please also be aware a professional copyeditor may have edited your manuscript to comply with the ATM style requirements.

In addition to proofing the article, the following queries have arisen during the preparation of your paper. Please address the queries listed below by making the appropriate changes in the text.

If you have any other revisions that you would like to make, this will be the last opportunity to do so before the article is published. In particular, please ensure that the author's names and affiliations have been identified correctly, and the address of the corresponding author is correct.

If the changes cannot be easily described through email, please annotate this proof according to the annotation guidelines as detailed on the following page.

| Query reference | Query                                                                                                                                      | Author's response |
|-----------------|--------------------------------------------------------------------------------------------------------------------------------------------|-------------------|
| Q1              | Please note that alterations cannot be made after you have approved for publication, irrespective of whether it is Online First.           | Confirmed         |
| Q2              | Author SURNAMES (family names) have been highlighted in red - please check that these are correct.                                         | Confirmed         |
| Q3              | Please check affiliations, correspondence details.                                                                                         | Confirmed         |
| Q4              | Please check acknowledgements section and confirm the conflict.                                                                            | Confirmed         |
| Q5              | Please note that the link with the doi number for the manuscript should be valid only after the whole issue is official published.         | Confirmed         |
| Q6              | Please confirm the correctness and consistence of any data or numbers described in the text, abstract, figure and table (e.g. percentage). | Confirmed         |
| Q7              | Figures 1,2,3: Please add staining methods and magnification.                                                                              | Confirmed         |

Once you have completed your revisions and/or addressed all the queries, or if you are satisfied with the proof in its existing form, please email: e-proof@amegroups.com.

**To ensure the timely publication of your article,  
please respond within 48 hours.**

## Making corrections

Use Adobe Reader – available for free from <http://get.adobe.com/reader/> – to open the attached document.

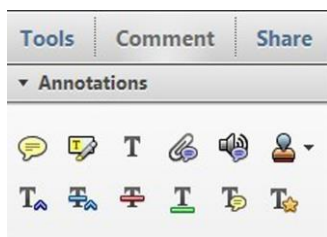

Figure 1 Adobe Acrobat X

Adobe Professional 7:

*Tools* → *Commenting* → *show Commenting Toolbar*

Adobe Reader 8:

*Tools* → *Comments & Markup* → *show Comments and Markup Toolbar*

Adobe Reader 10 and above:

*Comment* → *choose either Sticky Note or Highlight Text*

**In-text edits** Select the appropriate symbol and then click and drag over the text to be modified.

**Replace** : denotes where the text should be replaced with an alternative option

**Strikethrough** : crosses out the text

**Underline** : underlines the text

**Add note to text** : links selected text with a pop-up note

**Sticky notes** **To make a note:** choose the Sticky Note option and then click on a desired location

 **Changing the name:** double-click and choose Options → Sticky Note Properties → General → insert desired name

**To move:** click anywhere (apart from the text field) and drag

**To resize:** click on the right or left hand order and drag

**To close:** click the box on the upper right corner; this does NOT delete your note

**To delete:** click and press the Delete keyboard button or right click and select delete from the drop-down menu

**Highlighting** **This allows you can highlight parts of the text.**

 **To highlight:** select Highlight and then click and drag over the text to be highlighted. When finished, click on Highlight again to turn off the option.

**To change the colour:** double-click on the highlighted text and choose Options → Properties → Appearance → Color

Saving your changes:

Click on *File* → *Save* before closing the document.

For more detailed instructions on using Adobe Acrobat, please refer to

<http://www.adobe.com/support/acrobat/gettingstarted/>

# Irbesartan inhibits metastasis by interrupting the adherence of tumor cell to endothelial cell induced by angiotensin II in hepatocellular carcinoma

Long-Hai Feng<sup>1,2#</sup>, Hui-Chuan Sun<sup>1,2#</sup>, Xiao-Dong Zhu<sup>1,2</sup>, Shi-Zhe Zhang<sup>1,2</sup>, Xiao-Long Li<sup>1,2</sup>, Kang-Shuai Li<sup>1,2</sup>, Xue-Feng Liu<sup>1,2</sup>, Ming Lei<sup>1,2</sup>, Yan Li<sup>1,2</sup>, Zhao-You Tang<sup>1,2</sup>

<sup>1</sup>Department of Liver Surgery and Transplantation, Liver Cancer Institute and Zhongshan Hospital, Fudan University, Shanghai, China; <sup>2</sup>Key Laboratory of Carcinogenesis and Cancer Invasion of Ministry of Education, Shanghai, China

*Contributions:* (I) Conception and design: LH Feng, HC Sun, XD Zhu, ZY Tang; (II) Administrative support: HC Sun, XD Zhu, ZY Tang; (III) Provision of study materials or patients: HC Sun, XD Zhu, XL Li, ZY Tang; (IV) Collection and assembly of data: LH Feng, SZ Zhang, XL Li, KS Li, XF Liu, M Lei, Y Li; (V) Data analysis and interpretation: LH Feng, SZ Zhang, XL Li, KS Li, XF Liu, M Lei, Y Li; (VI) Manuscript writing: All authors; (VII) Final approval of manuscript: All authors.

<sup>#</sup>These authors contributed equally to this work.

*Correspondence to:* Zhao-You Tang, Department of Liver Surgery and Transplantation, Liver Cancer Institute and Zhongshan Hospital, Fudan University, Shanghai, China. Email: zytang88@163.com.

**Background:** The use of angiotensin II inhibitors is associated with a low risk of recurrence and metastasis in hepatocellular carcinoma (HCC) patients. Vascular cell adhesion molecule-1 (VCAM-1) is a key factor in tumor metastasis.

**Methods:** The effects of angiotensin II and irbesartan (an angiotensin II inhibitor) on HCC were explored with a xenograft model, microarray analysis and cell adhesion experiments. The relationship between the expression of VCAM-1 in HCC tissues and prognosis was analyzed with public and our institutional clinical databases. The effects of angiotensin II, irbesartan and VCAM-1 on adhesion and metastasis in HCC were explored with a xenograft model and cell adhesion experiments. The regulatory mechanisms were analyzed by Western blot analysis.

**Results:** Angiotensin II type 1 receptor and VCAM-1 were expressed in HCC tissues. Irbesartan inhibited HCC growth and metastasis in vivo and weakened the adhesion of HCC cells to endothelial cells, an effect that was enhanced by angiotensin II. VCAM-1 was found to be an independent risk factor for recurrence and survival in HCC patients with microvascular invasion. Angiotensin II upregulated VCAM-1 expression, and this upregulation was inhibited by irbesartan. Angiotensin II enhanced adhesion mainly by promoting the expression of VCAM-1 in HCC cells. Irbesartan inhibited the expression of VCAM-1 by reducing p38/MAPK phosphorylation activated by angiotensin II in HCC cells.

**Conclusions:** Irbesartan attenuates metastasis by inhibiting angiotensin II-activated VCAM-1 via the p38/MAPK pathway in HCC.

**Keywords:** Hepatocellular carcinoma (HCC); irbesartan; metastasis; vascular cell adhesion molecule-1 (VCAM-1)

Submitted Jul 18, 2020. Accepted for publication Nov 08, 2020.

doi: 10.21037/atm-20-5293

View this article at: <http://dx.doi.org/10.21037/atm-20-5293>



## 1 Introduction

2 Hepatocellular carcinoma (HCC) is the most frequently  
3 occurring primary liver cancer and the third leading  
4 cause of cancer-related death worldwide (1,2). The global  
5 estimated morbidity and related mortality rates continue to  
6 increase (3-5). Despite the tremendous progress achieved  
7 in the diagnosis and treatment of HCC, the overall efficacy  
8 remains unsatisfactory due to the high risk of recurrence  
9 and metastasis for patients undergoing curative therapy and  
10 the lack of effective drugs to target these phenomena (6,7).

11 Currently, accumulating evidence shows that angiotensin  
12 II (Ang II) inhibitors, which are common antihypertensive  
13 drugs, can provide survival benefits to cancer patients  
14 (8-10). These drugs can attenuate cancer progression  
15 promoted by Ang II, which promotes tumor growth or  
16 exacerbates tumor invasion and metastasis by mediating  
17 angiogenesis, inflammation and immunosuppressive  
18 microenvironments (11-13).

19 Ang II has been shown to promote the growth of HCC,  
20 epithelial-mesenchymal transition, and angiogenesis and  
21 mediate the inflammatory microenvironment via angiotensin  
22 II type 1 receptor (AGTR-1) (14-17). An increasing  
23 (6 clinical reports) supporting studies have confirmed that  
24 Ang II inhibitors can improve the prognosis of HCC patients  
25 by enhancing the efficacy of sorafenib, reducing the risk of  
26 recurrence and prolonging survival after curative treatments  
27 (10,18-22). We also reported that the use of Ang II inhibitors  
28 was associated with a reduced risk of disease recurrence,  
29 prolonged survival and a decreased rate of extrahepatic  
30 metastases in HCC patients after curative resection (23).

31 HCC is a cancer with typical hematogenous metastasis.  
32 Microvascular invasion (MVI) and circulating tumor cells  
33 (CTCs) are direct evidence of hematogenous metastasis  
34 and the main cause of metastasis (24,25). The adhesion  
35 of tumor cells to endothelial cells is a key step in tumor  
36 metastasis, and adhesion molecules play an important role  
37 in this process (26). Reports have indicated that Ang II  
38 can upregulate the expression of P-selectin, E-selectin and  
39 other adhesion molecules in endothelial cells to promote  
40 tumor cell adhesion, leading to the acceleration of tumor  
41 metastasis, and these molecules can be blocked by Ang II  
42 inhibitors (11,13). Hence, we speculated whether Ang II  
43 could also promote HCC metastasis in this way and, if so,  
44 whether this effect could be blocked by Ang II inhibitors.

45 In the present study, we found that irbesartan (an Ang  
46 II inhibitor and an AGTR-1 blocker) attenuated metastasis  
47 by inhibiting the adhesion of HCC cells to endothelial cells

49 enhanced by Ang II. Additionally, we found that irbesartan  
50 mainly reduced vascular cell adhesion molecule-1 (VCAM-1),  
51 which was promoted by Ang II via the p38/MAPK pathway  
52 in HCC cells to weaken this adhesion. We present the  
53 following article in accordance with the ARRIVE Checklist  
54 (available at <http://dx.doi.org/10.21037/atm-20-5293>).

## 55 Methods

### 56 Cell cultures

57 Human HCC cell lines (HCCLM3, HMHCC97-H,  
58 HMHCC97-L, SMMC-7721, Huh-7, Hep-3B and PLC),  
59 a hepatocyte cell line (L02) and human umbilical vein  
60 endothelial cells (HUVECs) were all obtained from the  
61 Liver Cancer Institute, Fudan University, Shanghai, China,  
62 and were cultured at 37 °C and 5% CO<sub>2</sub>. The HCC and  
63 hepatocyte cells were cultured in Dulbecco's modified  
64 Eagle's medium (DMEM; HyClone, Logan, Utah, USA)  
65 containing 10% fetal bovine serum (FBS; HyClone) and  
66 1% penicillin-streptomycin (PS; HyClone); HUVECs were  
67 cultured in endothelial cell medium (ECM; ScienCell, San  
68 Diego, California, USA) with 10% FBS, 1% PS and 1%  
69 endothelial cell growth supplement (ScienCell). It was  
70 approved by the Clinical Research Ethics Committee of  
71 Zhongshan Hospital, Fudan University, Shanghai, China  
72 (Approval No. B2012-010) and the individual consent for  
73 this retrospective analysis was waived.

### 74 Overexpression of AGTR-1 and knockdown of VCAM-1 by 75 transfection

76 H-AGTR-1-OE (overexpression of AGTR-1), H-VCAM-  
77 1-sh (knockdown of VCAM-1) and a vector control  
78 lentivirus were designed and constructed by Genomeditech  
79 (Shanghai, China). The cells ( $2 \times 10^5$ ) were seeded in  
80 each well of a six-well plate the day before transfection.  
81 Subsequently, the lentiviruses were added to the well  
82 with 2 mL of DMEM containing polybrene (5 µg/mL;  
83 Genomeditech) without FBS. Forty-eight hours later, the  
84 medium containing the lentivirus was removed and replaced  
85 with medium containing 10% FBS. The expression of  
86 AGTR-1 and VCAM-1 was assessed and validated by qPCR  
87 and Western blotting.

### 88 Immunohistochemistry

89 The UltraVision Quanto Detection HRP DAB System

97 (Thermo Fisher Scientific, San Diego, California, USA) was  
98 used to perform immunohistochemical staining following  
99 the manufacturer's protocols to detect whether AGTR-  
100 1, angiotensin II type 2 receptor (AGTR-2) and VCAM-  
101 1 were expressed in HCC tissues and lung metastases. The  
102 antibodies against these three proteins were all purchased  
103 from Abcam (Cambridge, UK) and were diluted as follows:  
104 AGTR-1, 1:100; AGTR-2, 1:250; VCAM-1, 1:250.

105

### 106 *Western blotting*

107

108 Western blotting was performed following a standard  
109 procedure as described previously (27). The primary  
110 antibodies used included those against AGTR-1 (rabbit  
111 antibody; 1:1000; Abcam), VCAM-1 (rabbit antibody;  
112 1:2000; Abcam), p38, p-p38, p65, p-p65, ERK, p-ERK,  
113 JNK and p-JNK (rabbit antibodies; 1:1000; Cell Signaling  
114 Technology, Danvers, Massachusetts, USA). The loading  
115 control antibodies, GAPDH (rabbit antibody; 1:1000) and  
116  $\alpha$ -tubulin (rabbit antibody; 1:1000), were purchased from  
117 BOSTER (Pleasanton, California, USA); the goat anti-  
118 rabbit IgG (1:5000) was from Yeasen (Shanghai, China).

119

### 120 *Quantitative real-time PCR assay*

121

122 RNA isolation from HCC cell lines and tissues and real-  
123 time PCR procedures were carried out according to  
124 the manufacturer's protocol (QuantStudio™3, Thermo  
125 Fisher Scientific, San Diego, California, USA). The  
126 internal reference primer, GAPDH, was purchased from  
127 Sangon Biotech (Shanghai, China). The PCR primers and  
128 sequences are shown in Table S1.

129

### 130 *Human gene expression microarray*

131

132 Total RNA was extracted from SMMC-7721-AGTR-  
133 1-OE, SMMC-7721-vector (control), Ang II-treated-  
134 HMHCC97-H, control-HMHCC97-H, Ang II-treated  
135 HCCLM3 and control-HCCLM3 cells and was analyzed  
136 by performing a human gene expression microarray (Agilent,  
137 Santa Clara, California, USA) from OE Biotech (Shanghai,  
138 China) to determine differential gene expression and  
139 biological behaviors.

140

### 141 *Cell adhesion assay*

142

143 The cell adhesion kit was purchased from KeyGEN  
144 BioTECH (Nanjing, Jiangsu, China), and the assay was

performed according to the manufacturer's protocol. The  
bottom of the 96-well plate was plated with HUVECs,  
and 100  $\mu$ L of a single HCC cell suspension with  
 $5 \times 10^5$  cells stained by calcein AM was added to the wells  
of a 96-well plate, which was then placed in the incubator  
for 30–120 minutes (depending on the attachment time  
of HCC cells). After incubation, the cell suspensions  
in the wells were removed and washed with 200  $\mu$ L of  
FBS-free DMEM 5 times to remove nonadhered HCC  
cells. PBS (200  $\mu$ L) was added to each well, after which  
the absorbance value was read (excitation wavelength  
=494 nm), from which the absorbance value of a blank  
control well was subtracted.

### *Experiments on nude mice*

As described in our previous study, an orthotopic tumor  
xenograft model and a lung metastasis model were set up  
with 5-week-old male BALB/c nude mice (Weight =18–20 g)  
obtained from the Beijing Vital River Laboratory Animal  
Technologies Co., Ltd and maintained under specific  
pathogen-free conditions (27,28). The animals were  
grouped randomly, and each group contained six mice.  
For the orthotopic tumor xenograft model, 200  $\mu$ L of  
the tumor cell suspension ( $5.0 \times 10^7$  cells/mL) was injected  
subcutaneously, and when the tumor grew to 1.0 cm in  
diameter (approximately 4 weeks), it was cut into small  
nodules ( $2.0 \times 2.0 \times 2.0$  mm<sup>3</sup>) and implanted into the liver.  
For the lung metastasis model, 150  $\mu$ L of the tumor cell  
suspension ( $1.0 \times 10^6$  cells) was injected into nude mice  
through the tail vein. The groups and time axes of animal  
experiments are shown in Figures S1,S2. After the mice  
were euthanized, the size of the liver tumors and number  
of lung metastases were measured (27). The animal  
experiments were approved by the Shanghai Medical  
Experimental Animal Care Committee (Approval date,  
December 2017). All procedures were performed following  
the Guide for the Care and Use of Laboratory Animals and  
complied with institutional ethical guidelines.

### *Drug dosage and mode of administration*

Ang II was administered by an ALZET osmotic pump  
(ALZA, Cupertino, California, USA; model: 1004; sustained  
release rate: 0.11  $\mu$ L/hour; duration: 4 weeks), which could  
release Ang II continuously, homogeneously and stably;  
avoid stress due to repeated administration; and protect  
the short half-life of the drug. Intragastric administration

193 was used for irbesartan (trade name: Aprovel; Sanofi, Paris,  
194 France).

195 Referring to previous studies and the conversions of  
196 doses between humans and animals, we used a dose of Ang  
197 II (Sigma, St. Louis, Missouri, USA) of 100 ng/kg/min for  
198 4 weeks in nude mice and a dose of irbesartan (Aprovel)  
199 of 30 mg/kg/day (13,29,30). For cytology experiments,  
200 Ang II (CSNpharm, Chicago, Illinois, USA) was used at  
201 0.1  $\mu$ M, irbesartan (CSNpharm) was used at 1  $\mu$ M,  
202 PD123319 (Abcam) was used at 1  $\mu$ M, and SB203580  
203 (p38/MAPK signaling pathway inhibitor, Absin, Shanghai,  
204 China) was used at 10  $\mu$ M (14,15,31-35). When Ang II was  
205 combined with irbesartan, PD123319 or SB203580, the  
206 HCC cells were treated with these drugs for 0.5–2 hours  
207 before the addition of Ang II to the medium.

#### 209 *Tissue preparation from patients and follow-up*

211 The KM plotter public database and cases from our  
212 hospital were used for survival analysis (36). After excluding  
213 cases with recurrent HCC or combined hepatocellular  
214 cholangiocarcinoma or those with a medical history  
215 of hepatic or other malignant tumor resection and/  
216 or perioperative mortality, 128 continuous HCC cases  
217 with MVI after curative resection were selected from the  
218 Department of Hepatology, Zhongshan Hospital, Fudan  
219 University, between January 2009 and December 2010.  
220 RNA from the HCC tissues was extracted from the frozen  
221 samples.

222 The data were extracted from medical records. The  
223 times to recurrence and overall survival were used as  
224 endpoint events. Follow-up and survival time calculations  
225 were performed as outlined in our previous report (23).

#### 227 *Statistical analysis*

229 MedCalc software (version 18.2.1; Ostend, West-  
230 Vlaanderen, Belgium) and R software (version 3.5.2) were  
231 used to analyze the data (37,38). All statistical tests were  
232 2-tailed and considered to be significantly different when  
233  $P < 0.05$ . Continuous variables were analyzed with a T test  
234 or a nonparametric test, and categorical variables were  
235 analyzed with the chi-square test, Fisher's exact test or the  
236 Wilcoxon signed-rank test, where appropriate. Kaplan-  
237 Meier and Cox proportional hazards regression analyses  
238 were used for survival. The optimal cutoff values of RNA  
239 expression of the adhesion factors were generated using R  
240 software with the *survminer* package (39).

## Results

### *Irbesartan weakened the adhesion of HCC cells enhanced by Ang II*

#### **Selection of the HMHCC97-H and HCCLM3 HCC cell lines as models based on their expression profiles of AGTR-1**

241 By immunohistochemical staining, we confirmed that  
242 AGTR-1 was expressed in human HCC tissues and that  
243 AGTR-2 was expressed weakly (*Figure 1A*). Next, the RNA  
244 and protein expression levels of AGTR-1 in commonly  
245 used HCC cell lines and the immortalized liver cell line  
246 L02 were analyzed (*Figure 1B,C*). The Hep-3B line had the  
247 highest expression level of AGTR-1, and the SMMC-7721  
248 cell line had the lowest expression level of AGTR-1.  
249 The expression levels of AGTR-1 in the HMHCC97-H  
250 and HCCLM3 cell lines were relatively high. Considering  
251 the tumorigenic capacity of each HCC line in animals, the  
252 HMHCC97-H and HCCLM3 lines, which have highly  
253 aggressive and metastatic abilities, were finally selected as  
254 the main model cells in our study (40,41).

#### **Irbesartan inhibited the growth and lung metastasis of HCC *in vivo***

255 The HMHCC97-H cell line was used to perform  
256 orthotopic tumor xenograft experiments in nude mice, and  
257 the HCCLM3 line was used to perform lung metastasis  
258 experiments (*Figure 2A,B*). The experimental animals  
259 were divided into 4 groups: control group, Ang II group,  
260 irbesartan group, and Ang II + irbesartan group (n=6  
261 per group; no adverse events). The orthotopic tumor  
262 xenograft analysis indicated that the irbesartan group  
263 had the smallest tumor volume ( $367.7 \pm 189.2 \text{ mm}^3$ ) and  
264 smallest number of lung metastases ( $1.5 \pm 1.6/\text{cm}^3$ ) and  
265 that the tumor volume in the Ang II group was the largest  
266 ( $1,238.7 \pm 675.9 \text{ mm}^3$ ) with the highest number of lung  
267 metastases ( $3.9 \pm 1.5/\text{cm}^3$ ). Compared with that in the Ang  
268 II group, the tumor volume and lung metastases were  
269 significantly reduced in the Ang II + irbesartan group.  
270 Irbesartan significantly inhibited tumor growth ( $P < 0.001$ )  
271 and reduced lung metastases from HCC ( $P = 0.036$ ). Lung  
272 metastasis analysis showed that the irbesartan group had  
273 the lowest tumor formation rate (16.7%) and fewest lung  
274 metastases (average of  $0.2 \pm 0.4$ ) and that the Ang II group  
275 had the highest formation rate of lung metastasis (100.0%)  
276 and most lung metastases (average,  $1.5 \pm 0.5$ ). Compared  
277 with the that of the control group, the average numbers  
278 of lung metastases in the Ang II group and irbesartan  
279

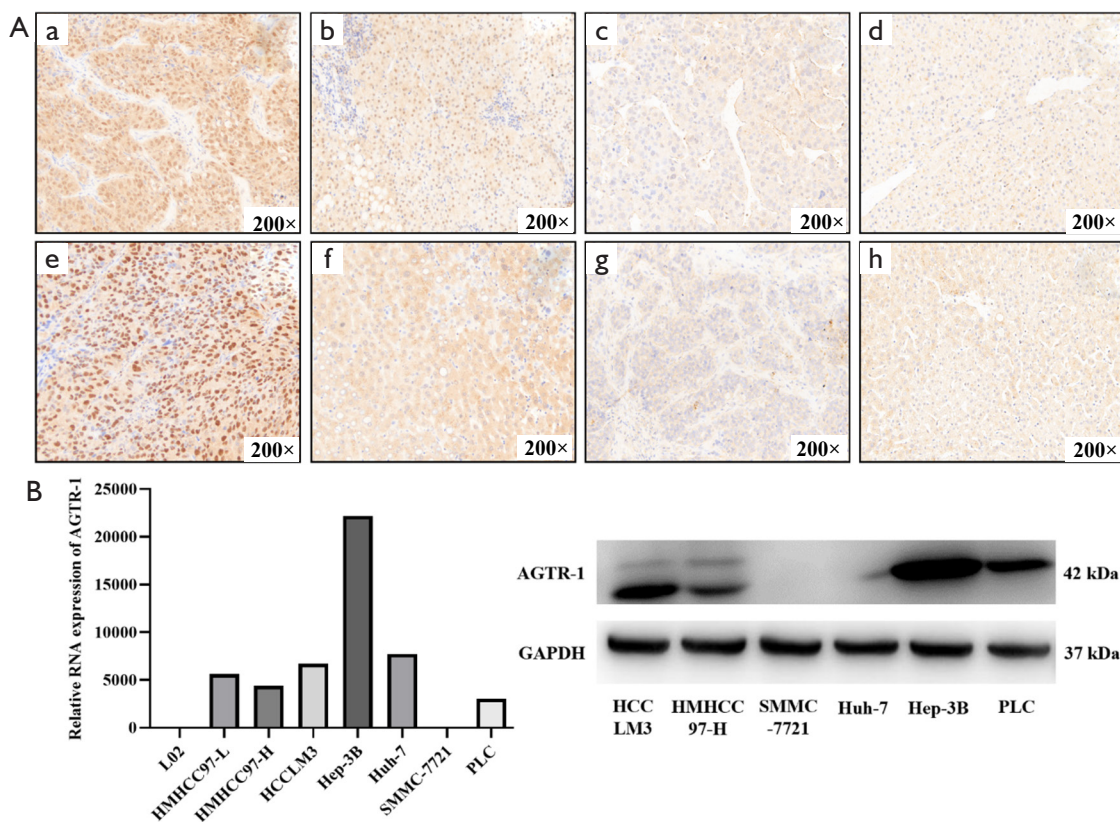

**Figure 1** AGTR-1 was expressed in HCC tissues and HCC cell lines. (A) Immunohistochemistry staining of HCC and paired peritumoral tissues. AGTR-1 protein was expressed in HCC tissues on HCC cells (a and e) but weakly expressed in peritumoral tissue (b and f); AGTR-2 protein was expressed weakly on both HCC (c and g) and paired peritumoral tissues (d and h). (B) Real-time PCR and (C) Western blotting of AGTR-1 expression in HCC cell lines and a hepatocyte cell line (L02).

289 group were significantly different ( $P=0.038$  and  $P=0.018$ ,  
 290 respectively). Compared with that in the Ang II group, the  
 291 lung metastasis rate and number of lung metastases were  
 292 reduced when Ang II was combined with irbesartan. These  
 293 *in vivo* experiments further confirmed that Ang II could  
 294 promote the growth and metastasis of HCC, which could  
 295 be inhibited by irbesartan.

### 297 Human gene expression microarray confirmed that Ang 298 II could affect the expression of adhesion molecules in 299 HCC cells

300 RNA from SMMC-7721-AGTR-1-OE, Ang II-treated-  
 301 HMHCC97-H, Ang II-treated HCCLM3 cells and the  
 302 corresponding control HCC cells was analyzed with an  
 303 Agilent human gene expression microarray. Compared with  
 304 the respective control group, all three groups indicated that  
 305 Ang II could affect the expression of adhesion molecules in  
 306 HCC cells (Figure S3).

### Irbesartan could inhibit the adhesion of HCC cells to endothelial cells enhanced by Ang II *in vitro* experiments

The HMHCC97-H and HCCLM3 HCC lines were used  
 to perform cell adhesion experiments. Each HCC line was  
 divided into six groups: the control group, Ang II group,  
 irbesartan group, Ang II + irbesartan group, PD123319  
 (AGTR-2 blocker) group, and Ang II + PD123319 group.  
 The corresponding treatments were administered for 48  
 hours, after which the adhesion between HCC cells and  
 HUVECs in each group was measured. Compared with  
 that in the control group, the adhesion of HCC cells to  
 HUVECs was enhanced in the Ang II group ( $P_{\text{HMHCC97-H}}=0.002$ ;  
 $P_{\text{HCCLM3}}=0.011$ ), and cell adhesion was decreased  
 in the Ang II + irbesartan group but not in the Ang II +  
 PD123319 group (Figure 2C). These results suggested that  
 Ang II may enhance the adhesion of HCC cells through  
 the AGTR-1 pathway. Compared with that in the control

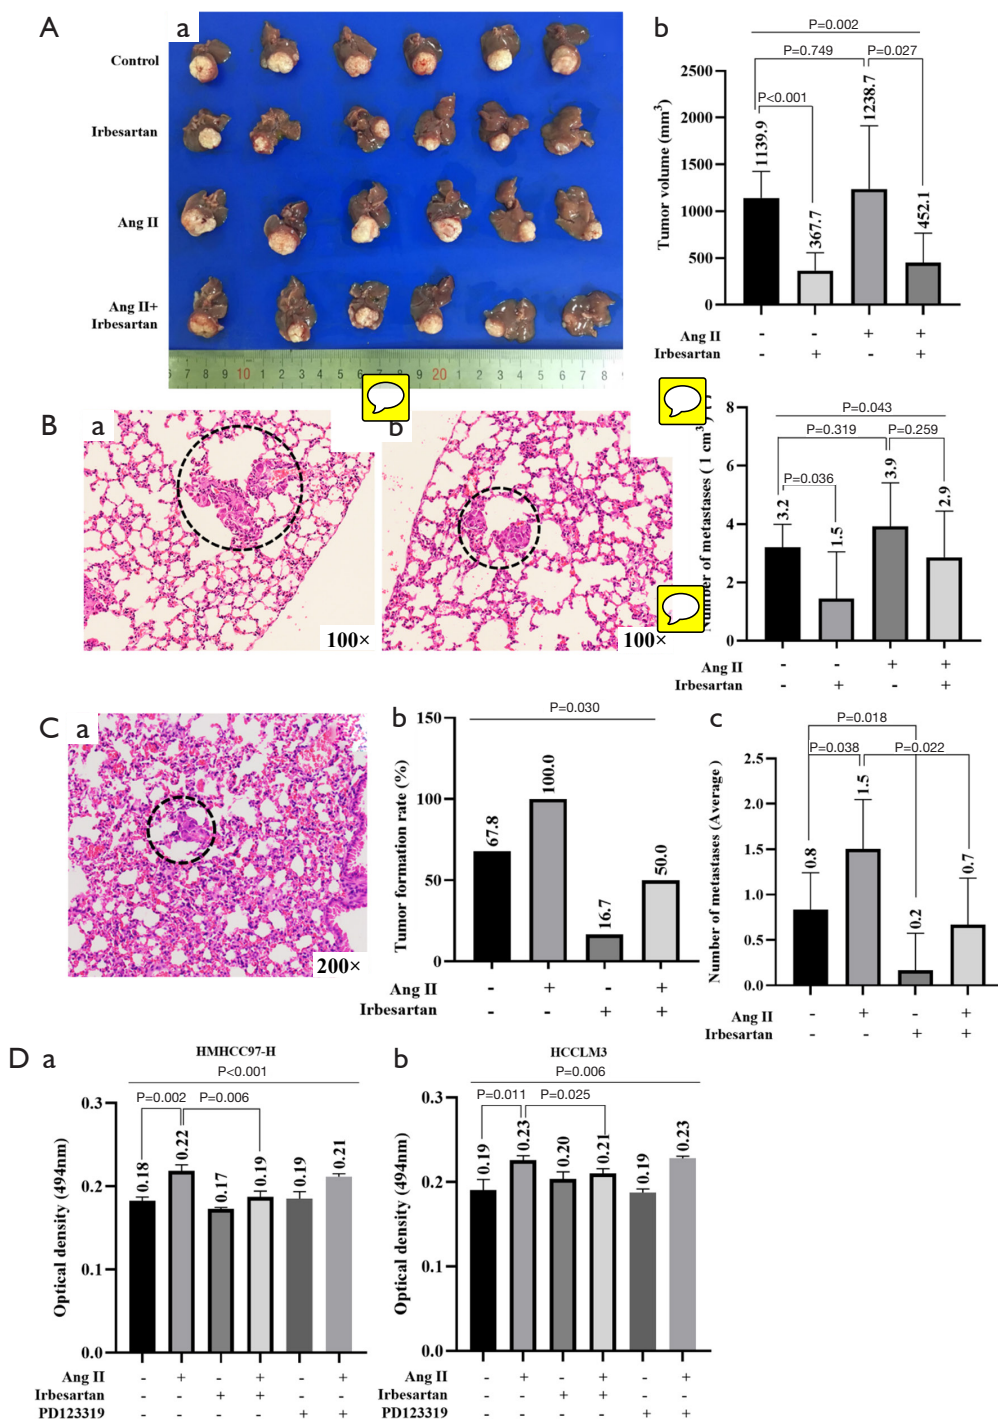

**Figure 2** Irbesartan inhibited the growth and metastasis of HCC and weakened the adhesion of HCC cells to endothelial cells promoted by Ang II (metastasis foci, the dotted circle). (A) Irbesartan inhibited the growth of HCC in the liver ( $P < 0.001$ ), and Ang II could promote the growth of HCC but without statistical significance ( $P = 0.749$ ). (B) Irbesartan inhibited lung metastasis of HCC in the liver ( $P = 0.036$ ), and Ang II could promote the metastasis of HCC but without statistical significance ( $P = 0.319$ ). (C) Lung metastasis model: irbesartan and Ang II affected metastasis formation in HCC (Figure b;  $P = 0.030$ ). Irbesartan inhibited the lung metastasis of HCC ( $P = 0.018$ ), and Ang II promoted the metastasis of HCC ( $P = 0.038$ ), which could be inhibited by irbesartan ( $P = 0.022$ ). (D) Irbesartan, but not PD123319 (AGTR-2 blocker), could inhibit the adhesion of HCC cells to endothelial cells enhanced by Ang II in HMHC97-H and HCCLM3 cells.

**Table 1** Multivariate analysis of clinicopathological parameters associated with recurrence and survival for hepatocellular carcinoma with microvascular invasion

| Clinicopathological parameters    | HR   | 95% CI    | P values |
|-----------------------------------|------|-----------|----------|
| Time to recurrence                |      |           |          |
| HBsAg                             | 0.49 | 0.28–0.86 | 0.013    |
| $\gamma$ -glutamyl transpeptidase | 1.67 | 1.05–2.67 | 0.030    |
| ICAM-2                            | 0.54 | 0.34–0.86 | 0.010    |
| VCAM-1                            | 2.67 | 1.68–4.25 | 0.001    |
| Overall survival                  |      |           |          |
| AFP                               | 1.76 | 1.07–2.88 | 0.025    |
| Size                              | 1.07 | 1.01–1.13 | 0.016    |
| ICAM-2                            | 0.40 | 0.23–0.70 | 0.001    |
| NRCAM                             | 0.59 | 0.39–0.90 | 0.014    |
| VCAM-1                            | 2.15 | 1.38–3.35 | 0.001    |

HR, hazard ratios; CI, confidence interval; ICAM-2, Intercellular cell adhesion molecule-2; NRCAM, Neuronal cell adhesion molecule; VCAM-1, Vascular cell adhesion molecule-1.

group, no significant differences in adhesion were found in the irbesartan and PD123319 alone groups, suggesting that the two inhibitors had no significant effect on the adhesion of HCC cells or enhancement of adhesion induced by Ang II (Figure 2C). Therefore, irbesartan could inhibit the adhesion of HCC cells enhanced by Ang II, and Ang II promoted adhesion mainly through AGTR-1 and not AGTR-2.

### ***Irbesartan inhibited adhesion by reducing VCAM-1 in HCC cells***

#### **The adhesion molecule VCAM-1 was associated with a poor prognosis of HCC with MVI and was highly expressed in HCC tissues and lung metastases**

Based on the human adhesion molecule array (RayBiotech, Atlanta, Georgia), 17 adhesion molecules were screened out, and the relationship between the RNA expression of the adhesion molecules in HCC tissues and prognosis was analyzed first with the KM plotter public database (Table S2). The adhesion molecules CEACAM-1, ICAM-1, ICAM-2, NRCAM, VCAM-1 and ICAM-3 were associated with poor outcomes in HCC patients with MVI (Figure S4). Subsequently, the relationships between these

6 adhesion molecules and the prognosis for HCC patients with MVI were reanalyzed and reverified with new cases from our hospital (Figure S5). Ultimately, we found that the high expression of VCAM-1 was an independent risk factor for both recurrence (hazard ratio =2.7; 95% confidence interval: 1.68–4.25;  $P < 0.001$ ) and survival (hazard ratio =2.2; 95% confidence interval: 1.38–3.35;  $P < 0.001$ ) in HCC patients with MVI after resection (Table 1; Table S3; Figure 3A,B). Additionally, immunohistochemical staining revealed that VCAM-1 was expressed in HCC tissues and lung metastases (Figure 3C).

#### **Irbesartan could inhibit VCAM-1 in HCC cells activated by Ang II**

To verify whether VCAM-1 was regulated by Ang II in HCC cells, the HMHCC97-H and HCCLM3 lines were used and divided into 4 groups: the control group, Ang II group, irbesartan group and Ang II + irbesartan group. The protein level of VCAM-1 in each group was assessed after the corresponding treatment measures were administered for 48 hours. VCAM-1 in the Ang II group increased, and the effect was inhibited by irbesartan in both the HMHCC97-H and HCCLM3 cell lines (Figure 3D,E). These data suggested that irbesartan could inhibit VCAM-1 in HCC cells activated by Ang II. In other words, VCAM-1 in HCC cells could be promoted by Ang II through the AGTR-1 pathway.

#### **The expression of VCAM-1 in HCC cells was shown to be related to adhesion in *in vitro* and *in vivo* experiments**

The expression of VCAM-1 at the RNA level in commonly used HCC cell lines was tested, and the HMHCC97-H and HCCLM3 cell lines, which have high VCAM-1 expression, were selected for the knockdown of VCAM-1 by lentiviral transfection (Figure 4A). Cell adhesion experiments were performed to test the adhesion of these two cell lines with VCAM-1 knockdown. The adhesion of HMHCC97-H and HCCLM3 cells to HUVECs decreased after VCAM-1 was knocked down ( $P_{\text{HMHCC97-H}} = 0.003$ ;  $P_{\text{HCCLM3}} = 0.006$ ; Figure 4B-a and b). In vivo, lung metastasis model experiments showed that the number of metastases was significantly reduced after VCAM-1 knockdown ( $P_{\text{HMHCC97-H}} = 0.013$ ;  $P_{\text{HCCLM3}} = 0.018$ ; Figure 4B-c and d;  $n = 6$  per group; no adverse events). The *in vitro* and *in vivo* results suggested that VCAM-1 expression in HCC cells was related to the adhesion of HCC cells to endothelial cells. Cells with a high expression of VCAM-1

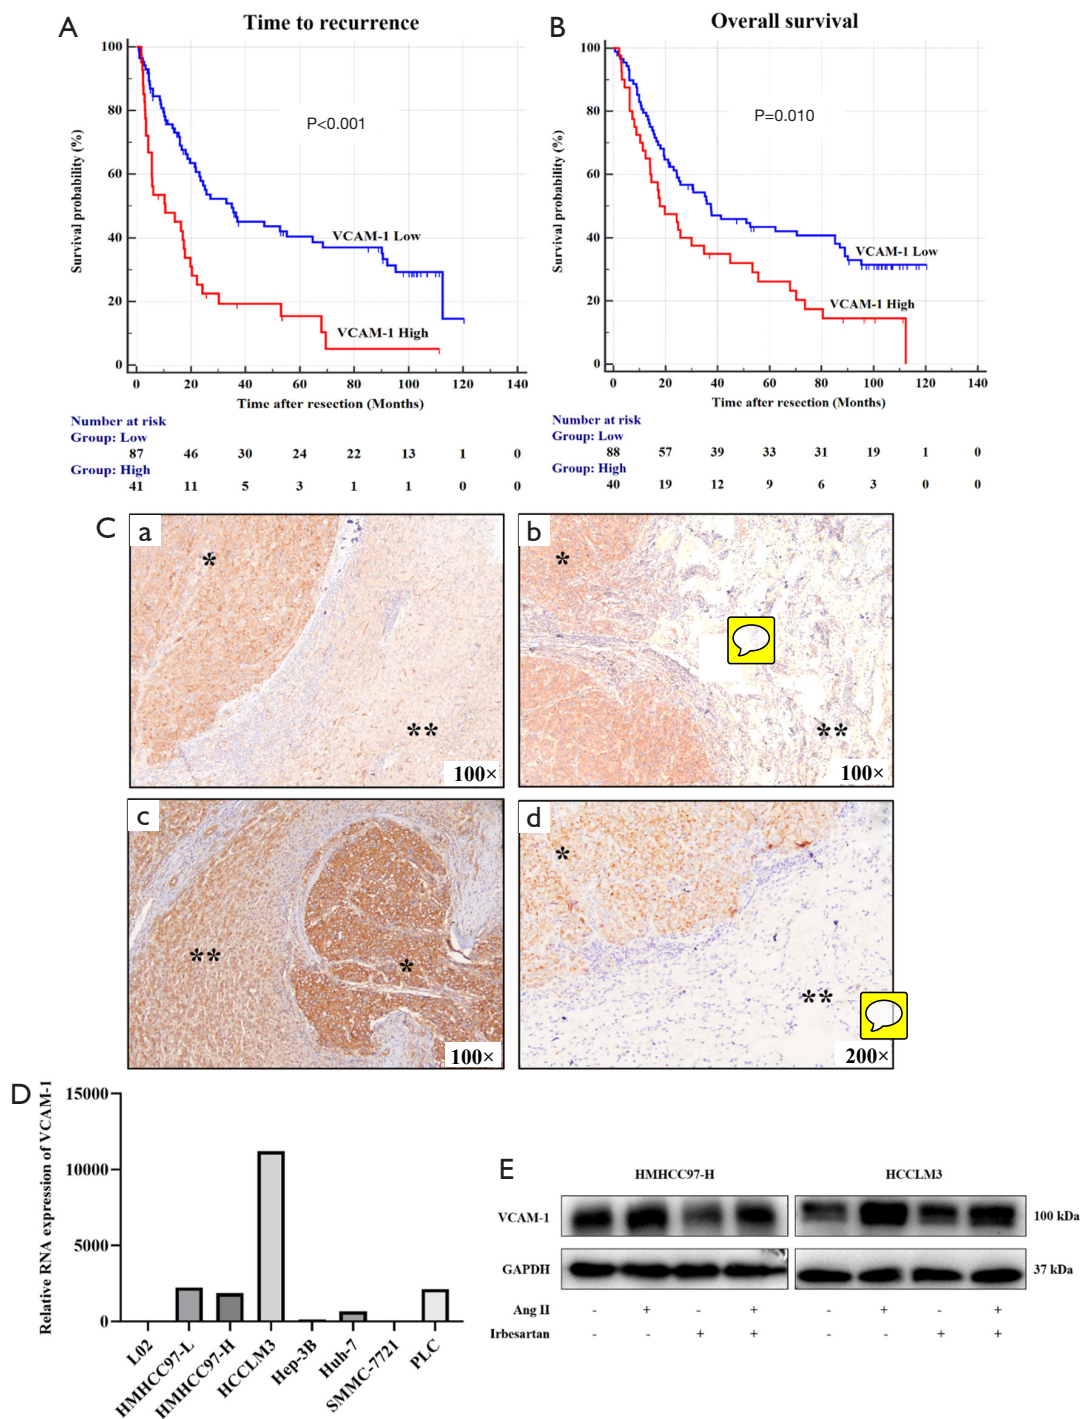

**Figure 3** A high level of VCAM-1 (RNA) expression in HCC tissues was associated with a poor prognosis; this expression could be promoted by Ang II and blocked by irbesartan. Survival analysis: a high level of VCAM-1 expression was found to be an independent risk factor for recurrence (A) and survival (B) in HCC patients with microvascular invasion after resection. (C) Immunohistochemical staining of HCC tissues and lung metastases: Case 1, primary HCC in the liver (a) and lung metastases (b); Case 2, primary HCC in the liver (c) and lung metastases (d). VCAM-1 was expressed on HCC tissues and HCC cells located in metastases and at a higher level than that in peritumoral tissues; \*, tumor; \*\*, metastases. (D) Real-time PCR: VCAM-1 was expressed on HCC cell lines. (E) The expression of VCAM-1 could be promoted by Ang II in HMHCC97-H and HCCLM3 cells and was inhibited by irbesartan (Ang II=0.1  $\mu$ M, irbesartan 1  $\mu$ M).

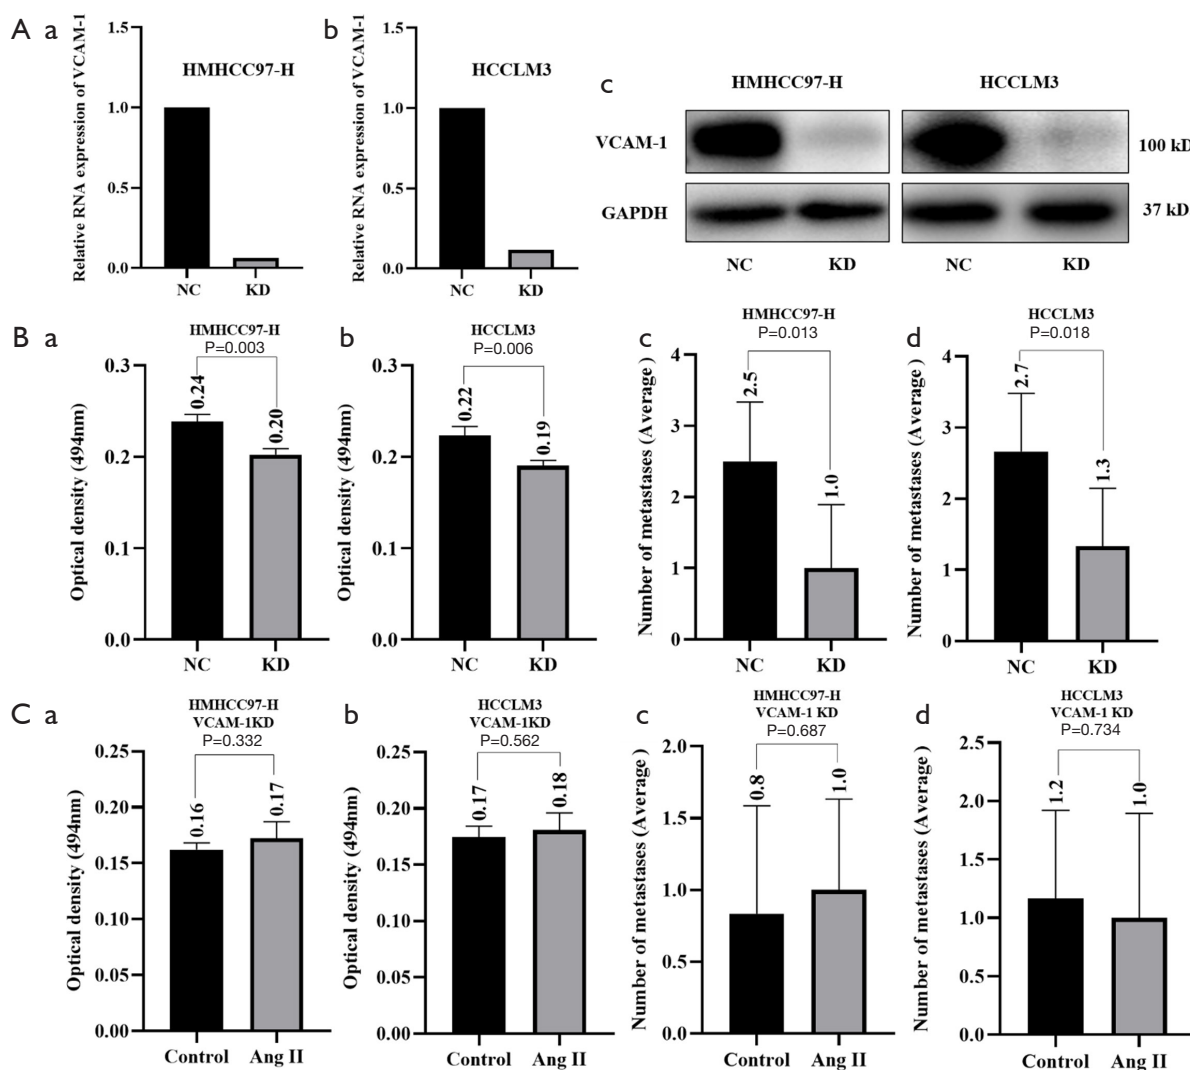

**Figure 4** VCAM-1 played a role in cell adhesion. Ang II enhanced adhesion mainly by promoting the expression of VCAM-1 in HCC cells. (A) Real-time PCR and Western blotting: verification of VCAM-1 knockdown in HMHCC97-H and HCCLM3 cells. (B) Cell adhesion experiment and lung metastasis model: after VCAM-1 was knocked down in HMHCC97-H and HCCLM3 cells, the adhesion of HCC cells to HUVECs decreased (a, b), and the number of lung metastases was significantly reduced (c, d). (C) Cell adhesion experiment and lung metastasis model: no significant difference was observed in absorbance (a, b) or in the number of lung metastases (Figure c, d) between the control and Ang II groups in HMHCC97-H and HCCLM3 cells with VCAM-1 knockdown. NC, control group; KD, VCAM-1 knockdown group.

397 had a strong adhesion ability.

398

#### 399 **Ang II-enhanced adhesion mainly depended on VCAM-** 400 **1 in HCC cells in *in vitro* and *in vivo* experiments**

401 The HMHCC97-H and HCCLM3 cell lines with knocked  
402 down VCAM-1 expression were divided into the control  
403 and Ang II groups. The cell adhesion experiments showed  
404 no significant difference in the absorbance between the  
405 control and Ang II groups in these HCC cell lines (Figure

406 4C-a and b). Furthermore, the lung metastasis experiments  
407 demonstrated that the number of lung metastases was  
408 not significantly different between the control and Ang  
409 II groups (Figure 4C-c and d; n=6 per group; no adverse  
410 events). When VCAM-1 was knocked down in HCC lines,  
411 the adhesion and metastases enhanced by Ang II were  
412 suppressed, indicating that Ang II-enhanced adhesion was  
413 mainly dependent on promoting the expression of VCAM-  
414 1 in HCC cells.



415 *Irbesartan inhibited VCAM-1 in HCC cells by reducing*  
416 *p38/MAPK phosphorylation activated by Ang II*

417 **Ang II could activate the p38/MAPK pathway in HCC**  
418 **cells, an effect that was blocked by its pathway inhibitor**  
419 **SB203580**

420 Reports in the literature have indicated that the p38/MAPK  
421 and NF- $\kappa$ B/p65 pathways play important roles in regulating  
422 adhesion molecules activated by Ang II in endothelial cells  
423 (42-44). Therefore, we focused on the phosphorylated  
424 protein levels of p38, p65, JNK and ERK in HMHCC97-H  
425 and HCCLM3 cells after Ang II treatment. The  
426 phosphorylation of p38 significantly increased after Ang  
427 II treatment and was blocked by the p38/MAPK pathway  
428 inhibitor SB203580 (*Figure 5A,B,C*).  
429

430

431 **The p38/MAPK pathway was involved in the Ang II**  
432 **promotion of VCAM-1 in HCC cells**

433 The HMHCC97-H and HCCLM3 lines were divided  
434 into 4 groups: the control group, Ang II group, SB203580  
435 group and Ang II + SB203580 group. The protein levels of  
436 VCAM-1 in each group were assessed. The Ang II group  
437 had the highest expression level of VCAM-1. When Ang  
438 II was combined with SB203580, VCAM-1 expression  
439 was significantly reduced, indicating that SB203580 could  
440 inhibit the promotion of VCAM-1 by Ang II (*Figure 5D*).  
441 This finding suggested that the p38/MAPK phosphorylation  
442 pathway was involved in the Ang II promotion of VCAM-1  
443 in HCC cells.  
444

445

446 **The Ang II-activated p38/MAPK pathway could be**  
447 **inhibited by irbesartan**

448 The HMHCC97-H and HCCLM3 lines were divided  
449 into 6 groups: the control group, Ang II group, irbesartan  
450 group, Ang II + irbesartan group, PD123319 (AGTR-  
451 2 blocker) group and Ang II + PD123319 group. The  
452 phosphorylation of p38 was assessed, and irbesartan was  
453 found to inhibit the phosphorylation of p38 activated  
454 by Ang II, while PD123319 had no significant effect on  
455 this phosphorylation (*Figure 5E*). This finding not only  
456 suggested that Ang II activated the p38/MAPK pathway  
457 mainly through the AGTR-1 receptor but also indicated  
458 that irbesartan inhibited VCAM-1 by reducing p38/MAPK  
459 phosphorylation activated by Ang II in HCC cells.  
460

461

462 **Discussion**

463 A high risk of recurrence and metastasis and a lack of

463 effective anti-recurrence treatments are the bottlenecks  
464 restricting surgical efficacy in HCC. Based on the previous  
465 discovery that Ang II inhibitors improve prognosis and  
466 reduce metastasis, we found that irbesartan attenuated  
467 metastasis by inhibiting Ang II-activated VCAM-1 via the  
468 p38/MAPK pathway in HCC.

469 Ang II inhibitors include angiotensin-converting enzyme  
470 inhibitors (ACEIs, such as captopril and enalapril) and  
471 angiotensin receptor blockers (ARBs, such as irbesartan  
472 and valsartan) (45). An ARB, irbesartan, rather than  
473 an ACEI, was used in our study because it is the most  
474 commonly used antihypertensive drug in HCC patients  
475 with primary hypertension at our hospital and serves as a  
476 selective AGTR-1 receptor blocker, facilitating analysis of  
477 the subsequent mechanism. More importantly, ACEIs, but  
478 not ARBs, have been shown to cause the accumulation of  
479 bradykinin, which has a cancer-promoting effect (45,46).

480 In this study, the first step was to identify that AGTR-  
481 1 was expressed in HCC tissues (*Figure 1A*). Subsequently,  
482 the HMHCC97-H and HCCLM3 cell lines, which  
483 have a relatively high expression of AGTR-1, better  
484 tumorigenicity, high invasiveness and metastasis potential,  
485 were selected for *in vivo* experiments (*Figure 1B,C*). The  
486 orthotopic liver transplantation experiment in nude mice  
487 found that irbesartan inhibited tumor growth in the liver,  
488 which is similar to observations in previous studies (14).  
489 We also found that irbesartan inhibited lung metastases  
490 promoted by Ang II (*Figure 2B*). The tumor size in the liver  
491 may affect the formation of lung metastases. Hence, lung  
492 metastasis experiments were performed, further verifying  
493 that Ang II promoted the lung metastasis of HCC, which  
494 could be inhibited by irbesartan (*Figure 2C*).  
495

496 Ang II, which has a certain organ specificity in terms  
497 of its physiological synthesis, comes from angiotensin I,  
498 which is catalyzed by angiotensin-converting enzymes on  
499 lung endothelial cells and is not only a part of the lung  
500 microenvironment but also a shaping factor. Ang II has been  
501 shown to stimulate endothelial cells to express adhesion  
502 molecules, promoting CTCs to adhere to endothelial cells  
503 and form metastases; this stimulatory effect can be blocked  
504 by Ang II inhibitors (11,13). Thus, we asked whether Ang  
505 II also stimulated the expression of adhesion molecules  
506 of HCC cells and promoted metastases in the same way  
507 and, if so, whether this stimulation was blocked by Ang II  
508 inhibitors. A human gene expression microarray was used to  
509 analyze Ang II-treated HMHCC97-H and HCCLM3 cells,  
510 as well as SMMC-7721 cells overexpressing the AGTR-  
511 1 receptor, and we confirmed that Ang II affected the

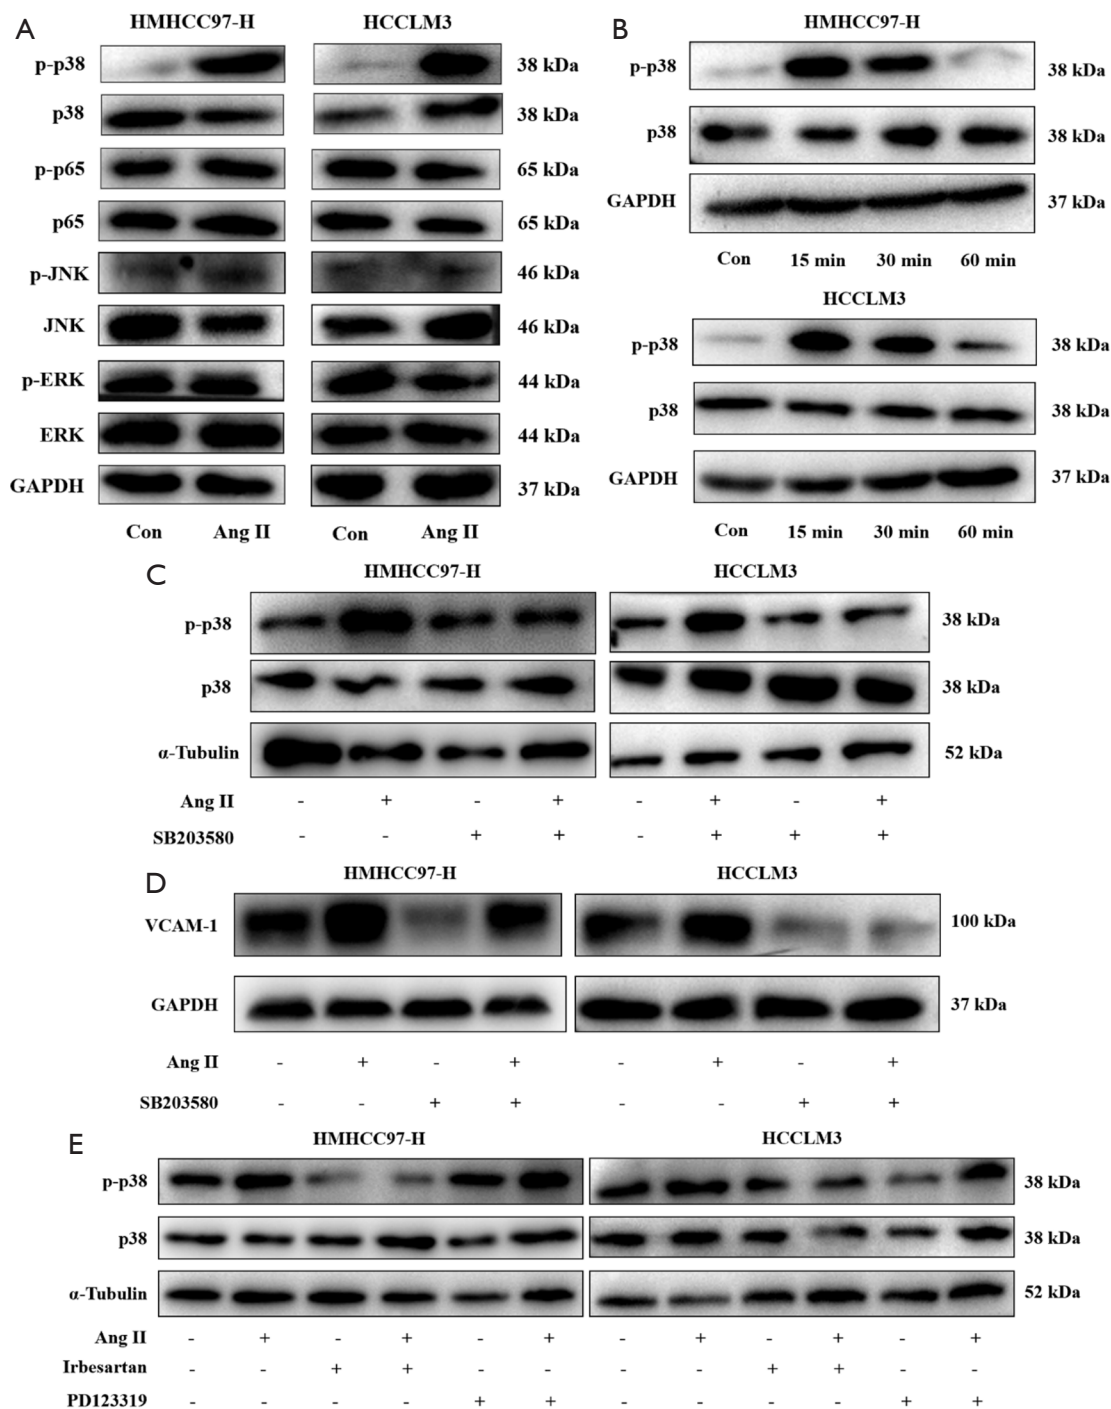

**Figure 5** Irbesartan reduced p38/MAPK phosphorylation and inhibited VCAM-1 expression in HCC cells. (A) The phosphorylation of p38 was significantly increased after Ang II treatment in HMHCC97-H and HCCLM3 cells. (B) The phosphorylation of p38 activated by Ang II gradually decreased with time in HMHCC97-H and HCCLM3 cells. (C) The phosphorylation of p38 activated by Ang II could be inhibited by SB203580 (p38/MAPK pathway inhibitor) in HMHCC97-H and HCCLM3 cells. (D) The expression of VCAM-1 promoted by Ang II in HMHCC97-H and HCCLM3 cells could be inhibited by SB203580, suggesting that the p38/MAPK pathway was involved in the Ang II promotion of VCAM-1 expression in HCC cells. (E) Irbesartan, but not PD123319 (AGTR-2 inhibitor), could inhibit the phosphorylation of p38 activated by Ang II. Con, control group.

511 expression of adhesion molecules in HCCs. Cell adhesion  
512 experiments indicated that Ang II could promote the  
513 adhesion of HCC cells to endothelial cells, an effect that  
514 was inhibited by irbesartan (Figure 2D).

515 Numerous tumor-related adhesion molecules have been  
516 identified. Therefore, we wanted to determine the key  
517 targets regulated by Ang II and irbesartan. The prerequisite  
518 for adhesion is that tumor cells have been in the circulatory  
519 system, and MVI is a direct evidence of hematogenous  
520 metastasis for HCC (24). Hence, the prognostic values  
521 of 17 adhesion molecules based on a human adhesion  
522 molecule array for HCC patients with MVI were analyzed  
523 with the KM plotter public database and clinical case data  
524 from our hospital. Ultimately, VCAM-1 was found to be an  
525 independent risk factor for recurrence and survival in HCC  
526 patients with MVI (Table 1; Figure 3A,B).

527 VCAM-1 is a 110-kDa transmembrane sialic acid  
528 glycoprotein belonging to the immunoglobulin superfamily  
529 of proteins. VCAM-1 can be expressed on tumor cells,  
530 endothelial cells and immune cells and plays an important  
531 role in tumor metastasis (47,48). Particularly in breast  
532 cancer, VCAM-1 participates in lymphatic metastasis, lung  
533 metastasis, bone metastasis and brain metastasis through  
534 different mechanisms (49). Therefore, VCAM-1 is a target  
535 not only for tumor therapy but also for metastasis detection  
536 by imaging (50).

537 However, we also wanted to determine whether VCAM-  
538 1 was expressed in HCC tissues, regulated by Ang II and  
539 irbesartan, and involved in the adhesion of HCC cells  
540 to endothelial cells. Our immunohistochemical results  
541 showed that VCAM-1 was expressed in HCC tissues and  
542 lung metastases (Figure 3C). Furthermore, Western blot  
543 experiments confirmed that Ang II could promote the  
544 expression of VCAM-1 in HCC cells, which could be  
545 inhibited by irbesartan (Figure 3E). Finally, cell adhesion  
546 experiments and lung metastasis experiments confirmed  
547 that the expression of VCAM-1 in HCC cells was related to  
548 adhesion (Figure 4B). The effect of Ang II mainly depended  
549 on promoting the expression of VCAM-1 in HCC cells  
550 to enhance the adhesion of HCC cells to endothelial cells  
551 (Figure 4C).

552 We also wanted to know how Ang II and irbesartan  
553 affected the expression of VCAM-1 in HCC cells.  
554 In cardiovascular diseases, VCAM-1 is an important  
555 inflammatory factor in endothelial cell damage induced by  
556 Ang II through the p38/MAPK and/or NF- $\kappa$ B/p65 pathways  
557 (42-44). In Ang II-treated HCC cells, the phosphorylation  
558 of p38 was enhanced most significantly, decreased gradually

over time and was inhibited by its inhibitor, SB203580  
(Figure 5A,B,C). These results supported the hypothesis  
that Ang II activates the p38/MAPK pathway in HCC cells.  
Furthermore, we confirmed that the p38/MAPK pathway  
was involved in the promotion of VCAM-1 by Ang II in  
HCC cells (Figure 5D). It can be easily speculated that  
irbesartan inhibits VCAM-1, probably because it inhibits the  
phosphorylation of p38 activated by Ang II. We confirmed  
that the phosphorylation of p38 activated by Ang II could  
be inhibited by irbesartan but not by PD123319 (AGTR-  
2 blocker; Figure 5E). Therefore, we finally speculated that  
Ang II could activate the p38/MAPK pathway through the  
AGTR-1 receptor pathway to promote VCAM-1 in HCC  
cells, which was blocked by irbesartan.

Our study possessed several limitations. First, the drug  
doses used in the cytology and animal experiments mainly  
relied on previous studies and were not directly determined.  
Second, cytology and animal experiments on VCAM-1 were  
primarily performed to establish knockdown HCC lines,  
which should be verified by the overexpression of VCAM-  
1 in HCC lines. Third, the results of the study should be  
verified with more HCC cell lines.

In conclusion, we found that the Ang II inhibitor  
irbesartan blocked the binding of Ang II and AGTR-1,  
reduced the phosphorylation of the p38/MAPK pathway  
activated by Ang II, inhibited VCAM-1 expression in HCC  
cells, weakened the adhesion of HCC cells to endothelial  
cells and attenuated metastasis. The high expression level of  
VCAM-1 in HCC tissues is an independent risk factor for  
the poor prognosis of HCC patients with MVI.

## Acknowledgments

*Funding:* This work was supported by the Leading  
Investigator Program of Shanghai municipal government  
(17XD1401100), the National Key Basic Research Program  
(973 Program; 2015CB554005) from the Ministry of  
Science and Technology of China, and the National Natural  
Science Foundation of China (81672326).

## Footnote

*Reporting Checklist:* The authors have completed the  
ARRIVE Checklist. Available at <http://dx.doi.org/10.21037/atm-20-5293>

*Data Sharing Statement:* Available at <http://dx.doi.org/10.21037/atm-20-5293>

607 *Conflicts of Interest:* All authors have completed the ICMJE  
608 uniform disclosure form (available at [http://dx.doi.](http://dx.doi.org/10.21037/atm-20-5293)  
609 [org/10.21037/atm-20-5293](http://dx.doi.org/10.21037/atm-20-5293)). The authors have no conflicts  
610 of interest to declare.

611  
612 *Ethical Statement:* The authors are accountable for all  
613 aspects of the work in ensuring that questions related  
614 to the accuracy or integrity of any part of the work are  
615 appropriately investigated and resolved. It was approved  
616 by the Clinical Research Ethics Committee of Zhongshan  
617 Hospital, Fudan University, Shanghai, China (Approval  
618 No.: B2012-010) and the individual consent for this  
619 retrospective analysis was waived. The animal experiments  
620 were approved by the Shanghai Medical Experimental  
621 Animal Care Committee (Approval date, December 2017).  
622 All procedures were performed following the Guide for the  
623 Care and Use of Laboratory Animals and complied with  
624 institutional ethical guidelines.

625  
626 *Open Access Statement:* This is an Open Access article  
627 distributed in accordance with the Creative Commons  
628 Attribution-NonCommercial-NoDerivs 4.0 International  
629 License (CC BY-NC-ND 4.0), which permits the non-  
630 commercial replication and distribution of the article with  
631 the strict proviso that no changes or edits are made and the  
632 original work is properly cited (including links to both the  
633 formal publication through the relevant DOI and the license).  
634 See: <https://creativecommons.org/licenses/by-nc-nd/4.0/>.

## 635 636 637 638 639 640 641 642 643 644 645 646 647 648 649 650 651 652 653 654

- 638 1. Villanueva A. Hepatocellular Carcinoma. *N Engl J Med* 2019;380:1450-62.
- 639 2. Forner A, Reig M, Bruix J. Hepatocellular carcinoma. *Lancet* 2018;391:1301-14.
- 640 3. Singal AG, Lampertico P, Nahon P. Epidemiology and surveillance for hepatocellular carcinoma: New trends. *J Hepatol* 2020;72:250-61.
- 641 4. Siegel RL, Miller KD, Jemal A. Cancer statistics, 2020. *CA Cancer J Clin* 2020;70:7-30.
- 642 5. Yang JD, Hainaut P, Gores GJ, et al. A global view of hepatocellular carcinoma: trends, risk, prevention and management. *Nat Rev Gastroenterol Hepatol* 2019;16:589-604.
- 643 6. Inarrairaegui M, Melero I, Sangro B. Immunotherapy of Hepatocellular Carcinoma: Facts and Hopes. *Clin Cancer Res* 2018;24:1518-24.
- 644 7. Pinter M, Peck-Radosavljevic M. Review article: systemic

- 655 treatment of hepatocellular carcinoma. *Aliment Pharmacol Ther* 2018;48:598-609. 656
- 657 8. Rosenthal T, Gavras I. Renin-Angiotensin Inhibition in Combating Malignancy: A Review. *Anticancer Res* 2019;39:4597-602. 658
- 659 9. Li XY, Sun JF, Hu SQ. The renin-angiotensin system blockers as adjunctive therapy for cancer: a meta-analysis of survival outcome. *Eur Rev Med Pharmacol Sci* 2017;21:1375-83. 660
- 661 10. Barone M, Viggiani MT, Losurdo G, et al. Systematic review: Renin-angiotensin system inhibitors in chemoprevention of hepatocellular carcinoma. *World J Gastroenterol* 2019;25:2524-38. 662
- 663 11. Ishikane S, Takahashi-Yanaga F. The role of angiotensin II in cancer metastasis: Potential of renin-angiotensin system blockade as a treatment for cancer metastasis. *Biochem Pharmacol* 2018;151:96-103. 664
- 665 12. Pinter M, Jain RK. Targeting the renin-angiotensin system to improve cancer treatment: Implications for immunotherapy. *Sci Transl Med* 2017;9. 666
- 667 13. Ishikane S, Hosoda H, Nojiri T, et al. Angiotensin II promotes pulmonary metastasis of melanoma through the activation of adhesion molecules in vascular endothelial cells. *Biochem Pharmacol* 2018;154:136-47. 668
- 669 14. Ji Y, Wang Z, Li Z, et al. Angiotensin II Enhances Proliferation and Inflammation through AT1/PKC/NF-kappaB Signaling Pathway in Hepatocellular Carcinoma Cells. *Cell Physiol Biochem* 2016;39:13-32. 670
- 671 15. Ji Y, Wang Z, Li Z, et al. Angiotensin II induces angiogenic factors production partly via AT1/JAK2/STAT3/SOCS3 signaling pathway in MHCC97H cells. *Cell Physiol Biochem* 2012;29:863-74. 672
- 673 16. Qi M, Zhou Y, Liu J, et al. AngII induces HepG2 cells to activate epithelial-mesenchymal transition. *Exp Ther Med* 2018;16:3471-7. 674
- 675 17. Yoshiji H, Noguchi R, Ikenaka Y, et al. Impact of renin-angiotensin system in hepatocellular carcinoma. *Curr Cancer Drug Targets* 2011;11:431-41. 676
- 677 18. Facciorusso A, Del Prete V, Crucinio N, et al. Angiotensin receptor blockers improve survival outcomes after radiofrequency ablation in hepatocarcinoma patients. *J Gastroenterol Hepatol* 2015;30:1643-50. 678
- 679 19. Pinter M, Weinmann A, Worns MA, et al. Use of inhibitors of the renin-angiotensin system is associated with longer survival in patients with hepatocellular carcinoma. *United European Gastroenterol J* 2017;5:987-96. 680
- 681 20. Kaibori M, Ishizaki M, Matsui K, et al. Evaluation of metabolic factors on the prognosis of patients undergoing 682
- 683
- 684
- 685
- 686
- 687
- 688
- 689
- 690
- 691
- 692
- 693
- 694
- 695
- 696
- 697
- 698
- 699
- 700
- 701
- 702

- 703 resection of hepatocellular carcinoma. *J Gastroenterol*  
 704 *Hepatol* 2011;26:536-43.
- 705 21. Yoshiji H, Noguchi R, Ikenaka Y, et al. Combination of  
 706 branched-chain amino acids and angiotensin-converting  
 707 enzyme inhibitor suppresses the cumulative recurrence  
 708 of hepatocellular carcinoma: a randomized control trial.  
 709 *Oncol Rep* 2011;26:1547-53.
- 710 22. Yoshiji H, Noguchi R, Toyohara M, et al. Combination of  
 711 vitamin K2 and angiotensin-converting enzyme inhibitor  
 712 ameliorates cumulative recurrence of hepatocellular  
 713 carcinoma. *J Hepatol* 2009;51:315-21.
- 714 23. Feng LH, Sun HC, Zhu XD, et al. Renin-angiotensin  
 715 inhibitors were associated with improving outcomes of  
 716 hepatocellular carcinoma with primary hypertension after  
 717 hepatectomy. *Ann Transl Med* 2019;7:739.
- 718 24. Cong WM, Bu H, Chen J, et al. Practice guidelines for  
 719 the pathological diagnosis of primary liver cancer: 2015  
 720 update. *World J Gastroenterol* 2016;22:9279-87.
- 721 25. Ahn JC, Teng PC, Chen PJ, et al. Detection of circulating  
 722 tumor cells and their implications as a novel biomarker for  
 723 diagnosis, prognostication, and therapeutic monitoring in  
 724 hepatocellular carcinoma. *Hepatology* 2020.
- 725 26. Honn KV, Tang DG. Adhesion molecules and tumor cell  
 726 interaction with endothelium and subendothelial matrix.  
 727 *Cancer Metastasis Rev* 1992;11:353-75.
- 728 27. Zhang YY, Kong LQ, Zhu XD, et al. CD31 regulates  
 729 metastasis by inducing epithelial-mesenchymal transition  
 730 in hepatocellular carcinoma via the ITGB1-FAK-Akt  
 731 signaling pathway. *Cancer Lett* 2018;429:29-40.
- 732 28. Shi WK, Zhu XD, Wang CH, et al. PFKFB3 blockade  
 733 inhibits hepatocellular carcinoma growth by impairing  
 734 DNA repair through AKT. *Cell Death Dis* 2018;9:428.
- 735 29. Janhavi P, Divyashree S, Sanjailal KP, et al. DoseCal: a  
 736 virtual calculator for dosage conversion between human  
 737 and different animal species. *Arch Physiol Biochem*  
 738 2019;1-5. [Epub ahead of print].
- 739 30. Wang YX, Martin-McNulty B, da Cunha V, et al. Fasudil,  
 740 a Rho-kinase inhibitor, attenuates angiotensin II-induced  
 741 abdominal aortic aneurysm in apolipoprotein E-deficient  
 742 mice by inhibiting apoptosis and proteolysis. *Circulation*  
 743 2005;111:2219-26.
- 744 31. Du N, Feng J, Hu LJ, et al. Angiotensin II receptor  
 745 type 1 blockers suppress the cell proliferation effects of  
 746 angiotensin II in breast cancer cells by inhibiting AT1R  
 747 signaling. *Oncol Rep* 2012;27:1893-903.
- 748 32. Nguyen L, Ager EI, Neo J, et al. Regulation of colorectal  
 749 cancer cell epithelial to mesenchymal transition by  
 750 the renin angiotensin system. *J Gastroenterol Hepatol*  
 2016;31:1773-82. 751
33. Li B, Wang Z, Hu Z, et al. P38 MAPK Signaling  
 Pathway Mediates Angiotensin II-Induced miR143/145  
 Gene Cluster Downregulation during Aortic Dissection  
 Formation. *Ann Vasc Surg* 2017;40:262-73. 752 753 754 755
34. Wang Y, Zhang X, Gao L, et al. Cortistatin exerts  
 antiproliferation and antimigration effects in vascular  
 smooth muscle cells stimulated by Ang II through  
 suppressing ERK1/2, p38 MAPK, JNK and ERK5  
 signaling pathways. *Ann Transl Med* 2019;7:561. 756 757 758 759 760
35. Pham H, Chong B, Vincenti R, et al. Ang II and EGF  
 synergistically induce COX-2 expression via CREB in  
 intestinal epithelial cells. *J Cell Physiol* 2008;214:96-109. 761 762 763
36. Nagy A, Lanczky A, Menyhart O, et al. Validation of  
 miRNA prognostic power in hepatocellular carcinoma  
 using expression data of independent datasets. *Sci Rep*  
 2018;8:9227. 764 765 766 767
37. Available online: <http://www.r-project.org/>. 768
38. Available online: <https://www.medcalc.org/index.php>. 769
39. Available online: <https://cran.r-project.org/web/packages/survminer/index.html>. 770 771
40. Tian J, Tang ZY, Ye SL, et al. New human hepatocellular  
 carcinoma (HCC) cell line with highly metastatic potential  
 (MHCC97) and its expressions of the factors associated  
 with metastasis. *Br J Cancer* 1999;81:814-21. 772 773 774 775
41. Li Y, Tian B, Yang J, et al. Stepwise metastatic human  
 hepatocellular carcinoma cell model system with multiple  
 metastatic potentials established through consecutive in  
 vivo selection and studies on metastatic characteristics. *J*  
*Cancer Res Clin Oncol* 2004;130:460-8. 776 777 778 779 780
42. Song KH, Park JH, Jo I, et al. Telmisartan attenuates  
 hyperglycemia-exacerbated VCAM-1 expression and  
 monocytes adhesion in TNFalpha-stimulated endothelial  
 cells by inhibiting IKKbeta expression. *Vascul Pharmacol*  
 2016;78:43-52. 781 782 783 784 785
43. Liang B, Wang X, Zhang N, et al. Angiotensin-(1-7)  
 Attenuates Angiotensin II-Induced ICAM-1, VCAM-1,  
 and MCP-1 Expression via the MAS Receptor Through  
 Suppression of P38 and NF-kappaB Pathways in  
 HUVECs. *Cell Physiol Biochem* 2015;35:2472-82. 786 787 788 789 790
44. Zhang F, Ren J, Chan K, et al. Angiotensin-(1-7) regulates  
 Angiotensin II-induced VCAM-1 expression on vascular  
 endothelial cells. *Biochem Biophys Res Commun*  
 2013;430:642-6. 791 792 793 794
45. Messerli FH, Bangalore S, Bavishi C, et al. Angiotensin-  
 Converting Enzyme Inhibitors in Hypertension: To Use  
 or Not to Use? *J Am Coll Cardiol* 2018;71:1474-82. 795 796 797
46. Wang G, Sun J, Liu G, et al. Bradykinin Promotes Cell 798

- 799 Proliferation, Migration, Invasion, and Tumor Growth of  
 800 Gastric Cancer Through ERK Signaling Pathway. *J Cell*  
 801 *Biochem* 2017;118:4444-53.
- 802 47. Schlesinger M, Bendas G. Vascular cell adhesion  
 803 molecule-1 (VCAM-1)--an increasing insight into its  
 804 role in tumorigenicity and metastasis. *Int J Cancer*  
 805 2015;136:2504-14.
- 806 48. Wieland E, Rodriguez-Vita J, Liebler SS, et al. Endothelial  
 807 Notch1 Activity Facilitates Metastasis. *Cancer Cell*  
 808 2017;31:355-67. 809
49. Sharma R, Sharma R, Khaket TP, et al. Breast cancer  
 810 metastasis: Putative therapeutic role of vascular cell adhesion  
 811 molecule-1. *Cell Oncol (Dordr)* 2017;40:199-208. 812
50. Cheng VWT, Soto MS, Khrapitchev AA, et al. VCAM-1-  
 813 targeted MRI Enables Detection of Brain Micrometastases  
 814 from Different Primary Tumors. *Clin Cancer Res*  
 815 2019;25:533-43. 816  
 817

**Cite this article as:** Feng LH, Sun HC, Zhu XD, Zhang SZ, Li XL, Li KS, Liu XF, Lei M, Li Y, Tang ZY. Irbesartan inhibits metastasis by interrupting the adherence of tumor cell to endothelial cell induced by angiotensin II in hepatocellular carcinoma. *Ann Transl Med* 2021. doi: 10.21037/atm-20-5293

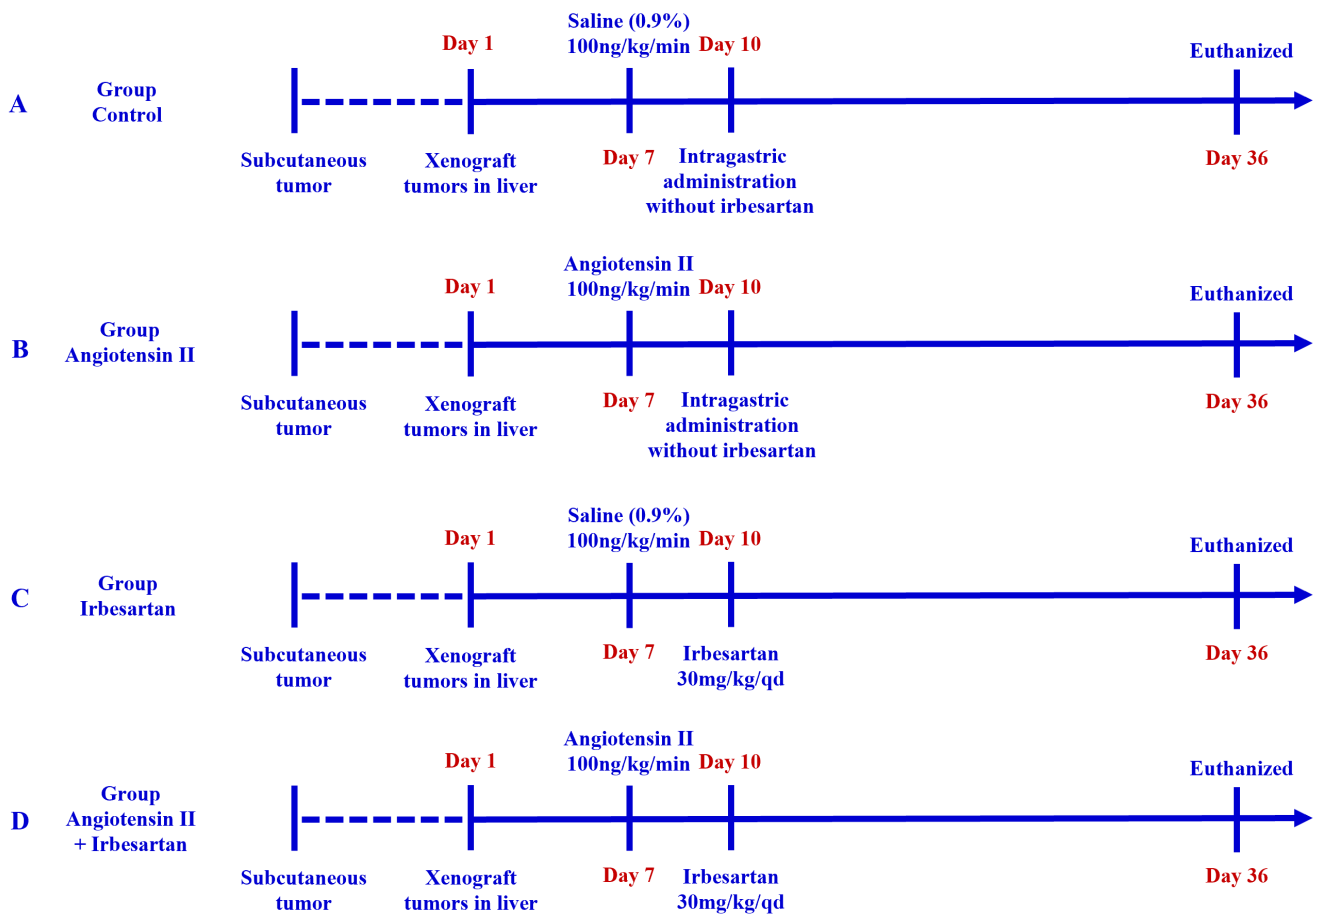

**Figure S1** The groups and time axes of animal experiments (Orthotopic tumor xenograft model).

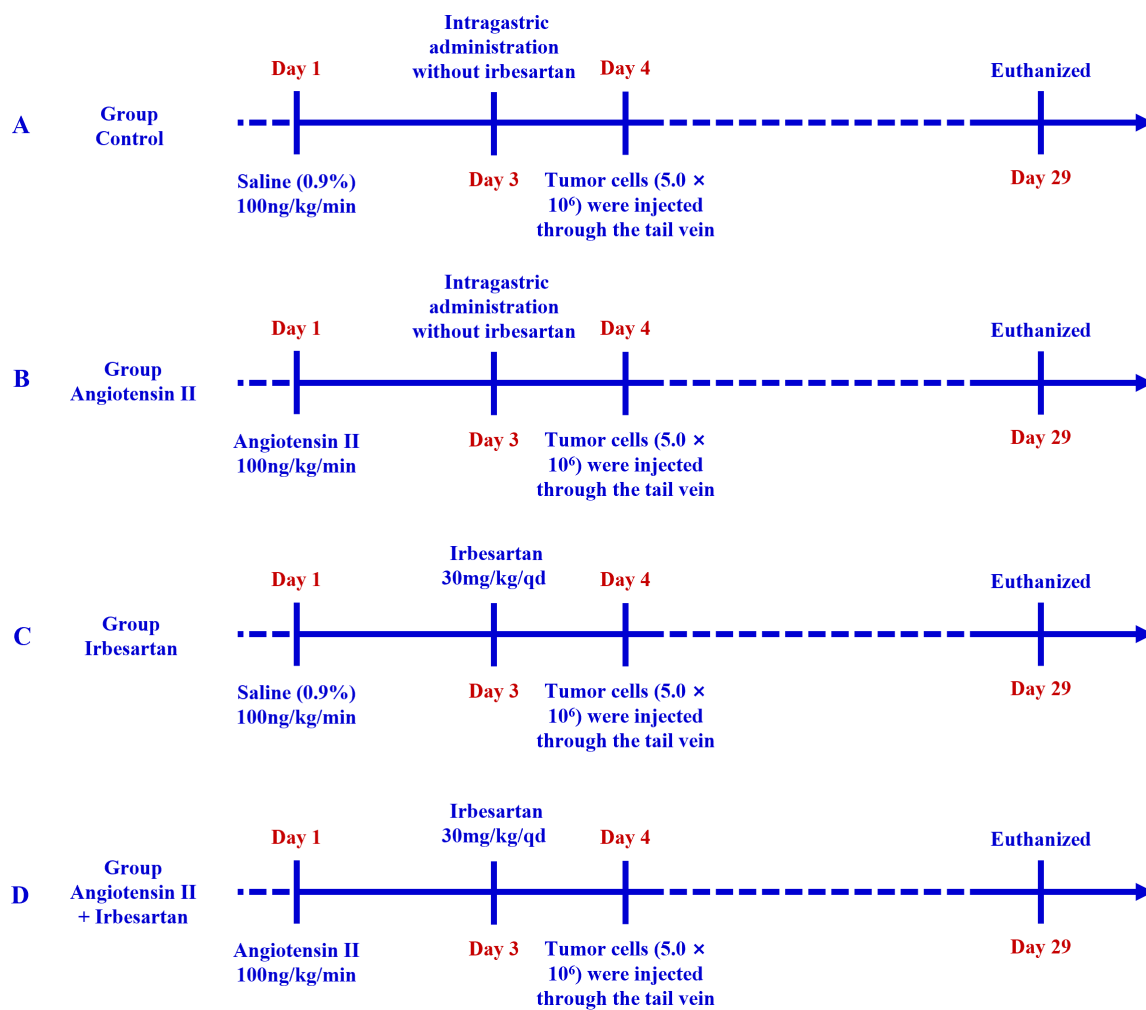

**Figure S2** The groups and time axes of animal experiments (Lung metastasis model).



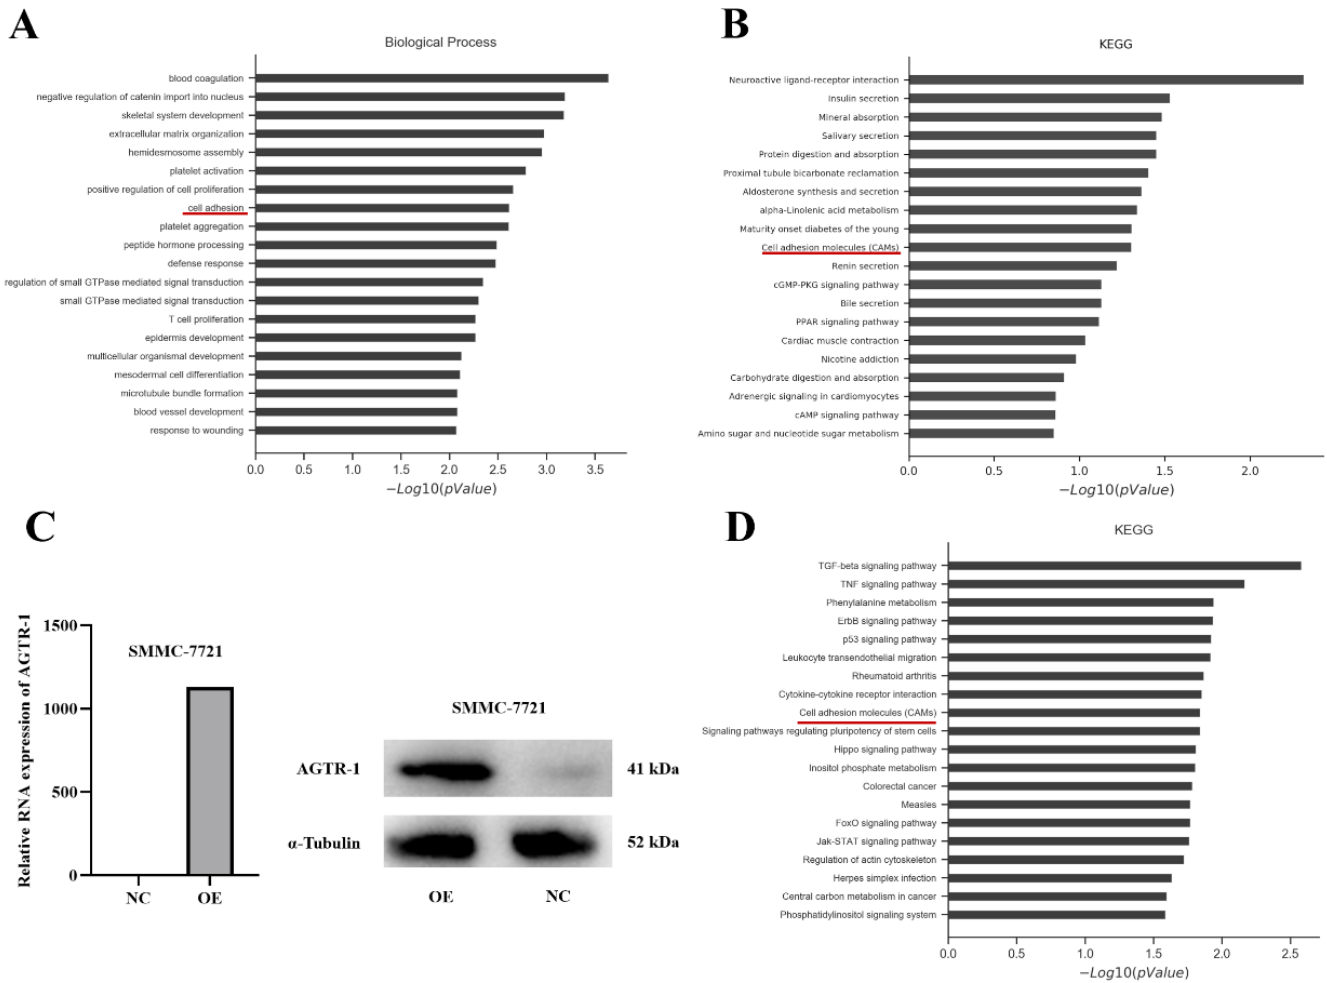

**Figure S3** Human gene expression microarray: Ang II could affect the expression of adhesion molecules in HCC cells. (A) Biological behavior analysis on Ang II-treated HMHCC97-H cells and control HMHCC97-H cells. (B) Kyoto Encyclopedia of Genes and Genomes (KEGG) analysis on Ang II-treated HCCLM3 cells and control HCCLM3 cells. (C) Real-time PCR and Western blot: verification of AGTR-1 overexpression in SMMC-7721 cells. (D) KEGG analysis on SMMC-7721-AGTR-1-overexpressed cells and SMMC-7721-Control cells. NC, control group; OE, AGTR-1 overexpression group.

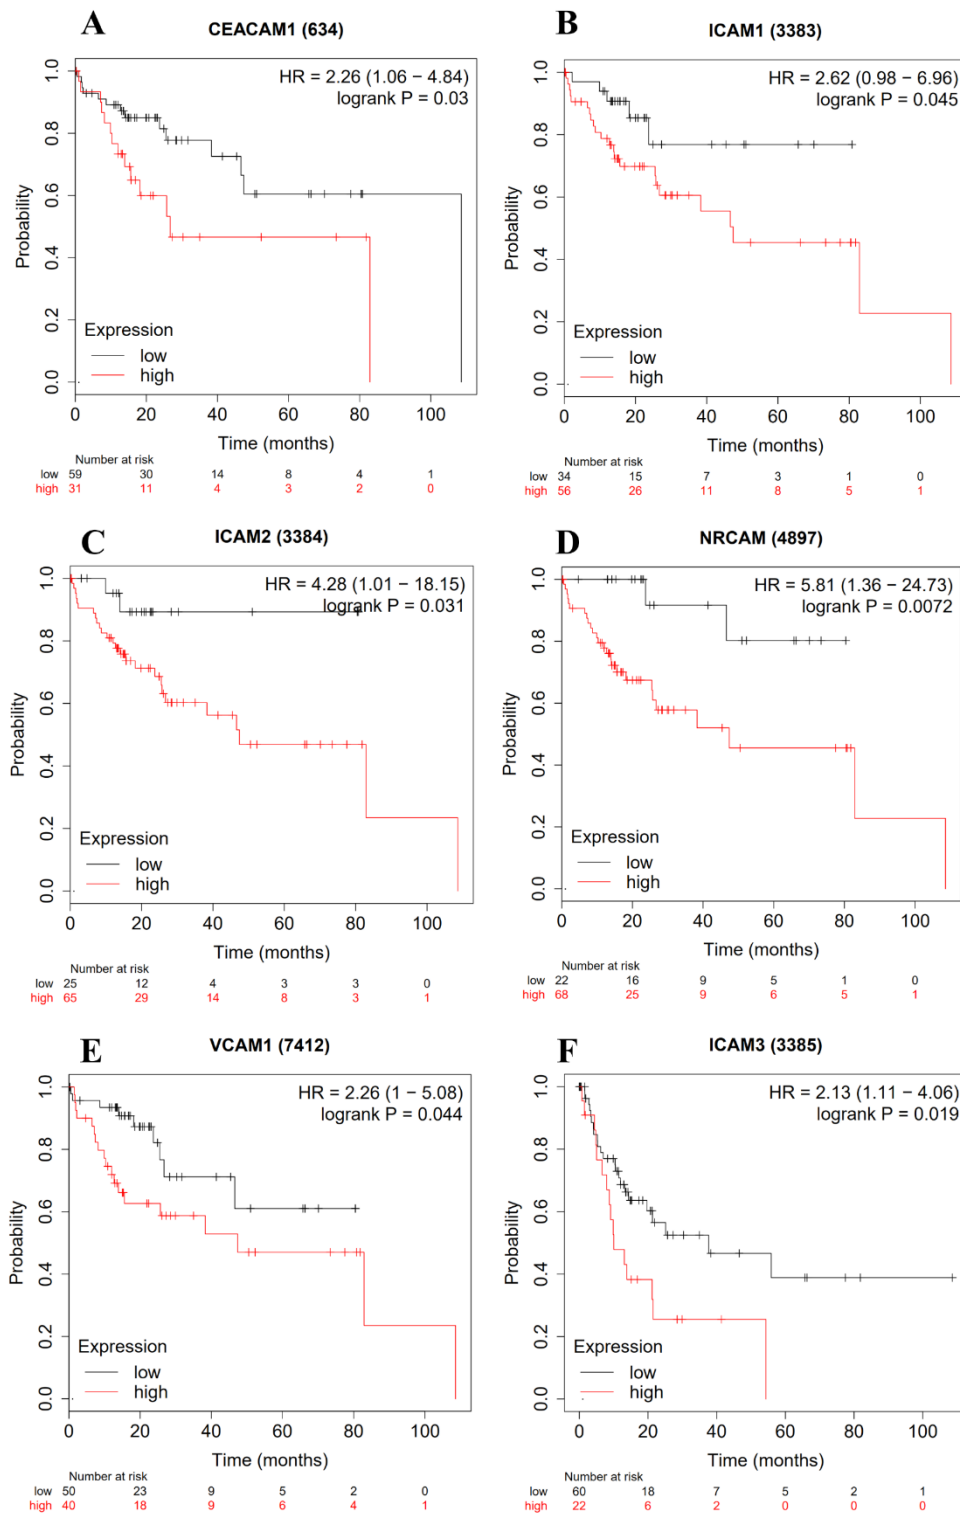

**Figure S4** The relationships between the expression of six adhesion molecules in HCC tissues and prognosis in HCC patients with microvascular invasion (KM-Plotter public database, n=90). (A) CEACAM-1, overall survival; (B) ICAM-1, overall survival; (C) ICAM-2, overall survival; (D) NRCAM, overall survival; (E) VCAM-1, overall survival; (F) ICAM-3, recurrence.

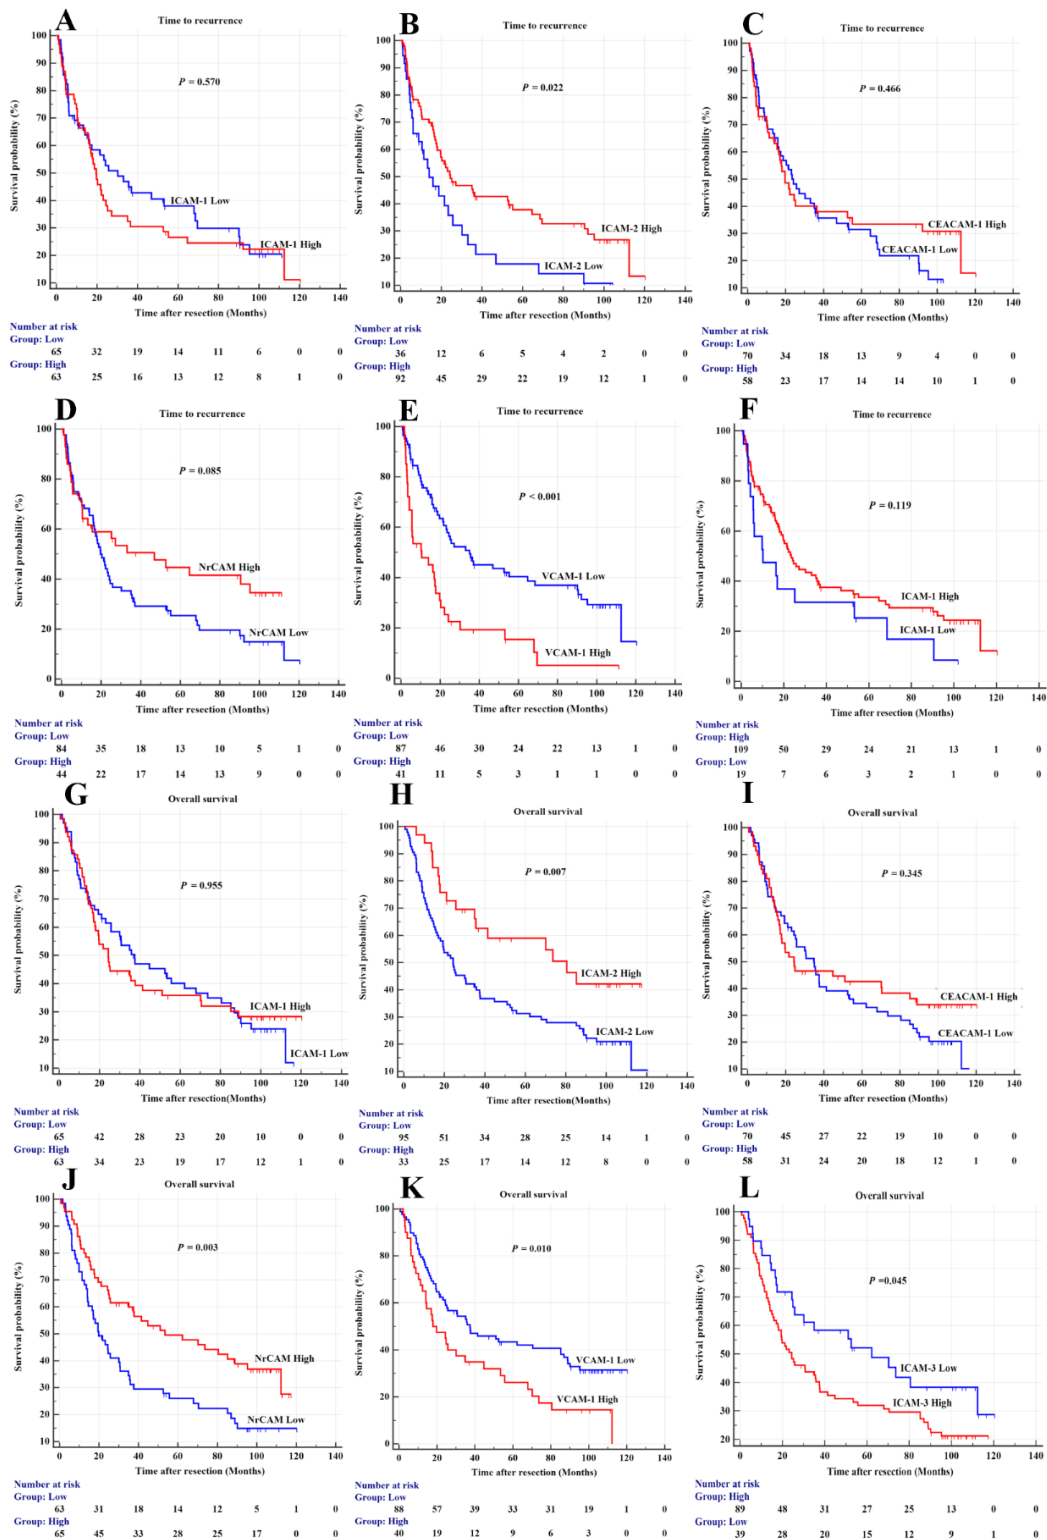

**Figure S5** The relationships between the expression of five adhesion molecules in HCC tissues and overall survival in HCC patients with microvascular invasion (clinical cases from our hospital, n=128). Recurrence: (A) CEACAM-1; (B) ICAM-1; (C) ICAM-2; (D) NRCAM; (E) VCAM-1; (F) ICAM-3. Overall survival: (G) CEACAM-1; (H) ICAM-1; (I) ICAM-2; (J) NRCAM; (K) VCAM-1; (L) ICAM-3.

**Table S1** PCR primers and sequences

| Name     | Primer  | Sequences (5'→3')      |
|----------|---------|------------------------|
| AGTR-1   | Forward | CACTGGCTGACTTATGCTTTTT |
| AGTR-1   | Reverse | TAGAAACACACTAGCGTACAGG |
| VCAM-1   | Forward | CAGGCTGGAGATAGACTTACTG |
| VCAM-1   | Reverse | CCTCAATGACAGGAGTAAAGGT |
| CEACAM-1 | Forward | CCACAGTCAAGACGATCATAGT |
| CEACAM-1 | Reverse | TCATCTTGTTAGGTGGGTCATT |
| ICAM-1   | Forward | TGCAAGAAGATAGCCAACCAAT |
| ICAM-1   | Reverse | GTACACGGTGAGGAAGGTTTTA |
| ICAM-2   | Forward | ATGAGACTCTGCACTATGAGAC |
| ICAM-2   | Reverse | GCTGAGTGTTTGTGAAAGATGT |
| NRCAM    | Forward | CGGAGCTGCAGTTTCTAATAAC |
| NRCAM    | Reverse | TGCAGGGAAGTACTAAAGACTG |

AGTR-1, angiotensin II type 1 receptor; VCAM-1, vascular cell adhesion molecule-1; CEACAM-1, CEA cell adhesion molecule-1; ICAM-1, intercellular cell adhesion molecule-1; ICAM-2, intercellular cell adhesion molecule-2; NRCAM, neuronal cell adhesion molecule.

**Table S2** Seventeen adhesion molecules and prognosis of hepatocellular carcinoma with microvascular invasion after resection (KM-plotter public database)

| Number | Adhesion molecules                            | Abbreviation | OS (n=90) | RFS (n=90) |
|--------|-----------------------------------------------|--------------|-----------|------------|
| 1      | Activated leukocyte cell adhesion molecule    | ALCAM        | -         | -          |
| 2      | Basal Cell Adhesion Molecule                  | BCAM         | -         | -          |
| 3      | CEA cell adhesion molecule-1                  | CEACAM-1     | ↑         | ↓          |
| 4      | Epithelial Cell Adhesion Molecule             | EpCAM        | ↓         | -          |
| 5      | Epithelial cadherin                           | E-Cadherin   | -         | -          |
| 6      | Intercellular cell adhesion molecule-1        | ICAM-1       | ↑         | -          |
| 7      | Intercellular cell adhesion molecule-2        | ICAM-2       | ↑         | -          |
| 8      | Intercellular cell adhesion molecule-3        | ICAM-3       | -         | ↑          |
| 9      | Neuronal cell adhesion molecule-1             | NCAM-1       | -         | -          |
| 10     | Neuronal cell adhesion molecule               | NRCAM        | ↑         | ↓          |
| 11     | Placental-cadherins                           | P-Cadherin   | -         | ↓          |
| 12     | Platelet endothelial cell adhesion molecule-1 | PECAM-1      | -         | ↓          |
| 13     | Endothelial selectin                          | E- Selectin  | -         | -          |
| 14     | Leukocyte selectin                            | L-Selectin   | -         | -          |
| 15     | Platelet selectin                             | P-Selectin   | -         | -          |
| 16     | Vascular cell adhesion molecule-1             | VCAM-1       | ↑         | -          |
| 17     | Vascular endothelial cadherin                 | VE-Cadherin  | ↓         | -          |

OS, overall survival; RFS, recurrence free survival; MVI, microvascular invasion; "↑", High expression is associated with poor prognosis; "↓", Low expression is associated with poor prognosis; "-", no difference in prognosis.

**Table S3** Univariate analysis of clinicopathological parameters associated with recurrence and survival in hepatocellular carcinoma patients with microvascular invasion

| Clinicopathological parameters | Number          | Time to recurrence | Overall survival |
|--------------------------------|-----------------|--------------------|------------------|
|                                |                 | P values           | P values         |
| Gender (Man/Female)            | 113/15          | 0.137              | 0.696            |
| Age (Year)                     | 128             | 0.662              | 0.637            |
| Transfusion (Yes/No)           | 15/113          | 0.342              | 0.529            |
| HBsAg (Positive/Negative)      | 19/109          | 0.004              | 0.044            |
| Pringle maneuver (Yes/No)      | 38/90           | 0.867              | 0.651            |
| AFP >20 µg/L (Yes/No)          | 93/35           | 0.564              | 0.047            |
| CA19-9 >40 µ/mL (Yes/No)       | 27/101          | 0.732              | 0.799            |
| ALT >50 U/L (Yes/No)           | 35/93           | 0.333              | 0.499            |
| AST >50 U/L (Yes/No)           | 24/104          | 0.349              | 0.863            |
| GGT >60 U/L (Yes/No)           | 77/51           | 0.027              | 0.065            |
| ALP >135 U/L (Yes/No)          | 18/110          | 0.529              | 0.616            |
| Total bilirubin (µmol/L)       | 128             | 0.365              | 0.470            |
| Albumin (g/L)                  | 128             | 0.693              | 0.426            |
| Hemoglobin (g/L)               | 128             | 0.691              | 0.354            |
| Platelet (10 <sup>9</sup> /L)  | 128             | 0.099              | 0.382            |
| Prothrombin time (second)      | 128             | 0.642              | 0.252            |
| Size (cm)                      | 128             | 0.270              | 0.014            |
| Singe nodule (Yes/No)          | 81/47           | 0.999              | 0.123            |
| Intact capsule (Yes/No)        | 53/75           | 0.524              | 0.269            |
| Differentiation (I-II/III-IV)  | 70/58           | 0.643              | 0.093            |
| Cirrhosis (Yes/No)             | 74/54           | 0.221              | 0.057            |
| Satellite nodules (Yes/No)     | 26/102          | 0.268              | 0.055            |
| Tumor thrombus (Yes/No)        | 30/98           | 0.541              | 0.048            |
| ICAM-1 (High/Low)              | 63/65 (63/65) † | 0.570              | 0.955            |
| ICAM-2 (High/Low)              | 92/36 (33/95) † | 0.022              | 0.007            |
| ICAM-3 (High/Low)              | 19/109(39/89) † | 0.118              | 0.045            |
| CEACAM-1 (High/Low)            | 58/70 (58/70) † | 0.466              | 0.345            |
| NRCAM (High/Low)               | 44/84 (65/63) † | 0.085              | 0.003            |
| VCAM-1 (High/Low)              | 41/87 (40/88) † | 0.001              | 0.010            |

†, group of overall survival. ALT, alanine transaminase; AST, aspartate aminotransferase; ALP, alkaline phosphatase; GGT,  $\gamma$ -glutamyl transpeptidase; ICAM-1, Intercellular cell adhesion molecule-1; ICAM-2, Intercellular cell adhesion molecule-2; ICAM-3, Intercellular cell adhesion molecule-3; CEACAM-1, CEA cell adhesion molecule-1; NRCAM, Neuronal cell adhesion molecule; VCAM-1, Vascular cell adhesion molecule-1.
