# Supplementary material for: Analysis of endometrial microbiota in intrauterine adhesion by high-throughput sequencing
Source: PubMed Central journal article supplement — Ann Transl Med. 2021 Feb;9(3):195. doi: 10.21037/atm-20-2813 (PMC7940878; doi:10.21037/atm-20-2813), 2021-02
Supplement: atm-09-03-195-supplementary.pdf [file atm-09-03-195-supplementary.pdf]

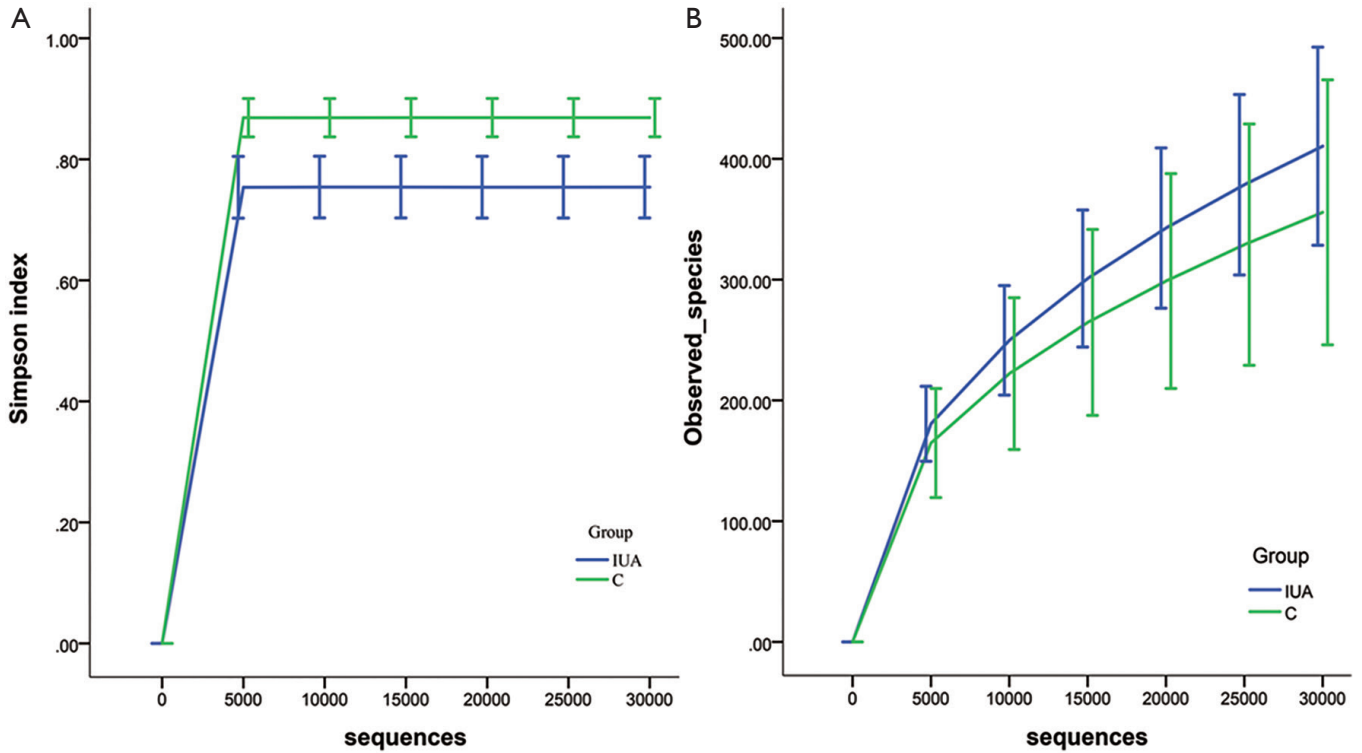

**Figure S1** 16S rRNA gene analysis indicated lower diversity in patients with IUA and high diversity in infertile females without intrauterine lesion. (A) The rarefaction curves of Simpson index showed that  $\alpha$ -diversity in patients with IUA was significantly lower than that in infertile females without intrauterine lesion ( $P=0.01$ ). (B) Patients with IUA had more OTUs than infertile females without intrauterine lesion ( $P=0.257$ ). These above data were based on 0–30,000 sequences per V4 data set.

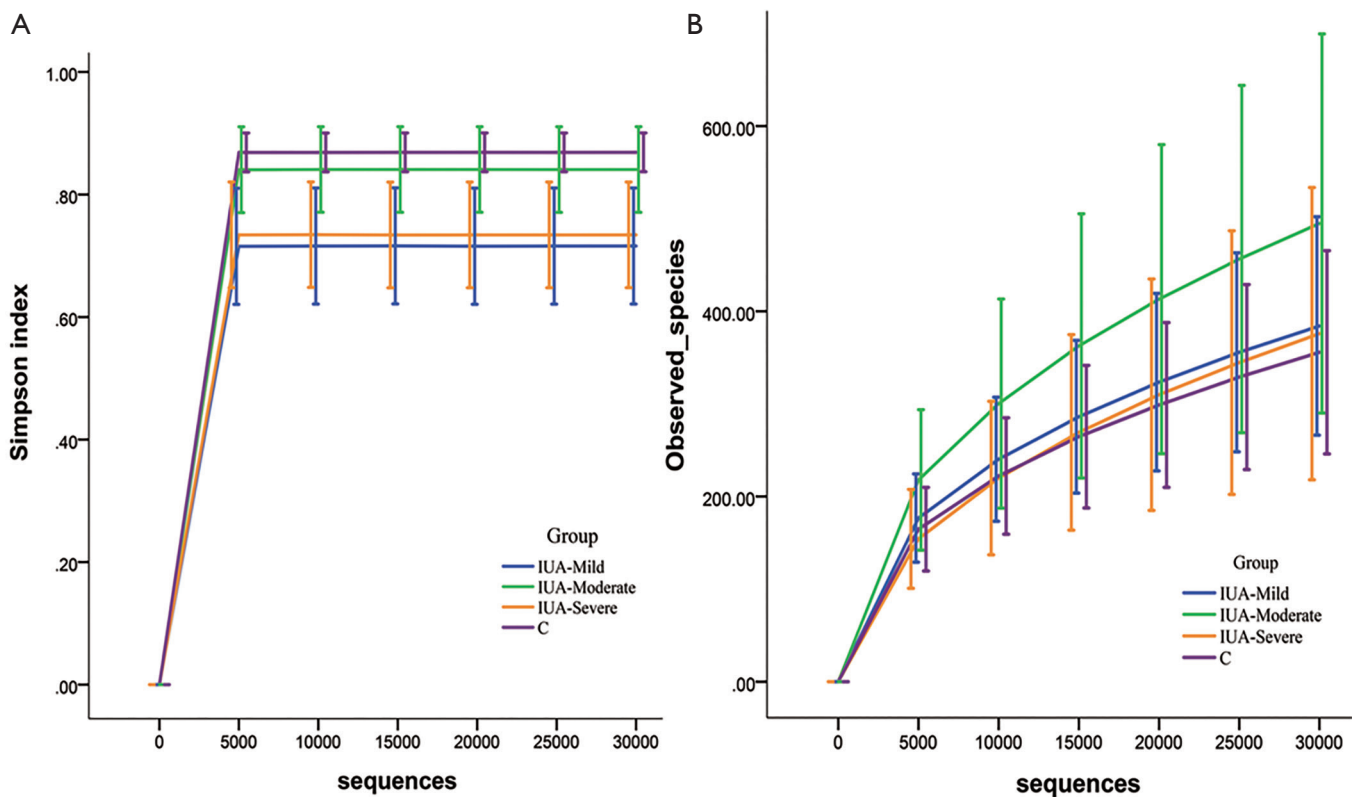

**Figure S2** 16S rRNA gene analysis indicated different diversities among patients with three IUA subgroups and infertile females without intrauterine lesion. (A) The rarefaction curves of Simpson index indicated significant difference in  $\alpha$ -diversity of endometrial bacteria between the different stage of IUA and infertile females without intrauterine lesion ( $P=0.011$ ). Infertile females without intrauterine lesion had the highest  $\alpha$ -diversity of endometrial bacteria. Both endometrial  $\alpha$ -diversity in the patients with mild IUA and the patients with severe IUA were different from infertile females without intrauterine lesion ( $P=0.012$ ,  $P=0.002$ ). (B) There was no difference between the groups in the observed species ( $P=0.491$ ). These above data were based on 0–30,000 sequences per V4 data set.

**Table S1** Number of raw reads, clean reads and effective in 67 samples of four groups by high-throughput sequencing

| Sample  | Raw Reads | Clean Reads | Clean Tags | effective |
|---------|-----------|-------------|------------|-----------|
| IUA-L1  | 237191    | 236011      | 213819     | 87.22     |
| IUA-L2  | 283199    | 281578      | 267890     | 92.77     |
| IUA-L3  | 292366    | 290654      | 274910     | 91.84     |
| IUA-L4  | 353348    | 351499      | 331449     | 91.21     |
| IUA-L5  | 248050    | 247055      | 230785     | 88.88     |
| IUA-L6  | 144998    | 144332      | 136710     | 90.93     |
| IUA-L7  | 217125    | 216097      | 205840     | 91.57     |
| IUA-L8  | 188815    | 188061      | 177391     | 91.46     |
| IUA-L9  | 228607    | 227467      | 215525     | 92.84     |
| IUA-L10 | 74719     | 74412       | 69150      | 93.77     |
| IUA-L11 | 100024    | 99614       | 92129      | 93.05     |
| IUA-L12 | 66488     | 66277       | 64298      | 97.63     |
| IUA-L13 | 70215     | 69929       | 67585      | 97.34     |
| IUA-L14 | 71556     | 71262       | 69301      | 97.18     |
| IUA-L15 | 116241    | 115842      | 113009     | 97.08     |
| IUA-L16 | 102393    | 101956      | 98495      | 96.95     |
| IUA-L17 | 110076    | 109746      | 106209     | 97.27     |
| IUA-L18 | 91679     | 91356       | 89067      | 97.26     |
| IUA-L19 | 144777    | 144241      | 140720     | 96.99     |
| IUA-L20 | 80983     | 80742       | 77738      | 97.07     |
| IUA-M1  | 273518    | 272098      | 238360     | 90.44     |
| IUA-M2  | 279111    | 277851      | 256228     | 90.28     |
| IUA-M3  | 423955    | 421485      | 398813     | 97.05     |
| IUA-M4  | 347448    | 345274      | 329815     | 93.89     |
| IUA-M5  | 90007     | 89603       | 83026      | 93.08     |
| IUA-M6  | 116856    | 116387      | 105980     | 91.99     |
| IUA-M7  | 172898    | 172145      | 164778     | 92.48     |
| IUA-M8  | 192713    | 191981      | 180111     | 90.26     |
| IUA-M9  | 108764    | 108280      | 100634     | 89.51     |
| IUA-M10 | 124279    | 123808      | 120679     | 96.7      |
| IUA-M11 | 110977    | 110579      | 107642     | 97.01     |
| IUA-M12 | 138066    | 137471      | 133337     | 97.2      |
| IUA-H1  | 317647    | 316049      | 303506     | 96.04     |
| IUA-H2  | 339318    | 337394      | 322330     | 92.58     |
| IUA-H3  | 278663    | 277185      | 261956     | 93.02     |
| IUA-H4  | 264109    | 262650      | 247099     | 85.36     |
| IUA-H5  | 201741    | 200843      | 191721     | 94.78     |
| IUA-H6  | 76573     | 76252       | 72378      | 92.99     |
| IUA-H7  | 57090     | 56869       | 54727      | 92.88     |
| IUA-H8  | 51665     | 51462       | 46613      | 94.71     |
| IUA-H9  | 143699    | 143165      | 139607     | 97.5      |
| IUA-H10 | 93160     | 92825       | 90194      | 97.15     |
| IUA-H11 | 102579    | 102240      | 99942      | 97.78     |
| IUA-H12 | 96858     | 96531       | 94128      | 97.02     |
| IUA-H13 | 93553     | 93240       | 90821      | 97.17     |
| IUA-H14 | 70021     | 69799       | 66932      | 96.69     |
| C1      | 342848    | 340861      | 322066     | 91.44     |
| C2      | 246925    | 245707      | 232991     | 87.84     |
| C3      | 209052    | 207954      | 199902     | 94.34     |
| C4      | 296978    | 295557      | 281284     | 89.82     |
| C5      | 163580    | 162992      | 154773     | 91.78     |
| C6      | 144029    | 143427      | 136028     | 89.8      |
| C7      | 100138    | 99748       | 92847      | 94.03     |
| C8      | 58560     | 58301       | 54959      | 91.84     |
| C9      | 183039    | 182294      | 174081     | 94.13     |
| C10     | 103415    | 102964      | 94463      | 91.72     |
| C11     | 48172     | 47952       | 39339      | 94.03     |
| C12     | 63169     | 62960       | 60356      | 96.77     |
| C13     | 67383     | 67144       | 65398      | 97.01     |
| C14     | 72544     | 72324       | 69459      | 96.87     |
| C15     | 66409     | 66157       | 63548      | 96.9      |
| C16     | 129163    | 128678      | 124356     | 97.39     |
| C17     | 115265    | 114905      | 111477     | 97.44     |
| C18     | 93204     | 92875       | 89512      | 97.51     |
| C19     | 111262    | 110869      | 107899     | 94.32     |
| C20     | 157915    | 157347      | 152031     | 97.77     |
| C21     | 123292    | 122809      | 119509     | 97.13     |
| Total   | 10684460  | 10635422    | 10089655   | /         |
| Average | 159469.55 | 158737.64   | 150591.9   | 94.12     |

IUA-L, intrauterine adhesion patients with low-grade; IUA-M, intrauterine adhesion patients with middle-grade; IUA-H, intrauterine adhesion patients with high-grade; C, control group.
